# Supplementary material for: Risk factors for community-acquired pneumonia in adults in Europe: a literature review
Source: HighWire-hosted journal article supplement (doi:10.1136/thoraxjnl-2013-204282), 2013-10-15
Supplement: thoraxjnl-2013-204282supp_tables.pdf [file thoraxjnl-2013-204282supp_tables.pdf]

**Supplementary Table S1.** Methodology and patient demographics of studies included in the review.

| Reference           | Country; region      | Study method                                                                           | Study period             | Population                                                                                                                                 | Age (yrs [mean±SD])                                                                                   | Definition of CAP                                                                              |
|---------------------|----------------------|----------------------------------------------------------------------------------------|--------------------------|--------------------------------------------------------------------------------------------------------------------------------------------|-------------------------------------------------------------------------------------------------------|------------------------------------------------------------------------------------------------|
| Almirall 2008 [36]  | Spain; east coast    | Multicentre, prospective, population-based, case-control study                         | 1 Nov 1999–30 Nov 2000   | Primary care patients >14 yrs<br>Cases, n=1336<br>Controls, n=1326                                                                         | Cases:<br>Male, 58.6±19.8;<br>Female, 54.6±20.7<br>Controls:<br>Male, 58.9±19.6;<br>Female, 54.6±20.6 | Chest X-ray confirmed                                                                          |
| Almirall 2010 [37]  | Spain; east coast    | Multicentre, prospective, regional, population-based, observational case-control study | 1 Nov 1999–30 Nov 2000   | Primary care patients >14 yrs with chronic bronchitis, COPD or asthma requiring inhaled therapy<br>Cases, n=473<br>Controls, n=235         | Cases, 59.6±20.0<br>Controls, 60.9±20.7                                                               | Chest X-ray confirmed                                                                          |
| Almirall 2013 [12]  | Spain; Mataró        | Single-centre, prospective, observational, case-control study                          | Feb 2008–Feb 2010        | Patients ≥70 yrs with CAP requiring hospitalisation<br>Cases, n=36<br>Controls, n=72                                                       | Cases, mean±SEM<br>81.22±0.77<br>Controls, mean±SEM<br>81.21±0.53                                     | Chest X-ray confirmed and bacteriological identification                                       |
| Bénard 2010 [24]    | France; Aquitaine    | Multicentre, prospective, cohort study                                                 | 2000–2007                | Patients with HIV, n=3336; 135 with bacterial pneumonia                                                                                    | Median, 39.6 [IQR 34.5–46.0]                                                                          | Chest X-ray confirmed and bacteriological identification or successful antibacterial treatment |
| Bewick 2012 [38]    | UK; Nottingham       | Two-centre, prospective, observational cohort study                                    | Sept 2008–Sept 2010      | Patients ≥16 yrs hospitalised with CAP, n=920 (5.5% nursing home residents); 366 with pneumococcal pneumonia (6.8% nursing home residents) | Median, 71.7 [IQR 57.8–80.8]                                                                          | Chest X-ray confirmed                                                                          |
| Cabre 2010 [13]     | Spain; Mataró        | Single-centre, prospective, observational study                                        | Jan 2001–Aug 2005        | Patients ≥70 yrs with CAP requiring hospitalisation, n=134 (32% nursing home residents)                                                    | 84.51±6.8                                                                                             | Chest X-ray confirmed                                                                          |
| Carratalà 2007 [39] | Spain; Barcelona     | Single-centre, prospective, observational study                                        | 1 Jan 2001–31 Dec 2004   | Adult patients with CAP requiring hospitalisation, n=601                                                                                   | 63.7±17.1                                                                                             | Chest X-ray confirmed                                                                          |
| Che 2008 [30]       | France; metropolitan | Multicentre, prospective, population-based, case-                                      | 1 Sept 2002–31 Sept 2004 | Patients with sporadic Legionnaires' disease                                                                                               | 57 [range, 18–93]                                                                                     | Chest X-ray confirmed and laboratory evidence                                                  |

| Reference              | Country; region         | Study method                                           | Study period              | Population                                                                                                                                                  | Age (yrs [mean±SD])                                                                           | Definition of CAP                                                                        |
|------------------------|-------------------------|--------------------------------------------------------|---------------------------|-------------------------------------------------------------------------------------------------------------------------------------------------------------|-----------------------------------------------------------------------------------------------|------------------------------------------------------------------------------------------|
|                        |                         | control study                                          |                           | Cases, n=546<br>Controls, n=546                                                                                                                             |                                                                                               | of <i>Legionella pneumophila</i> infection                                               |
| Chidiac 2012 [31]      | France; metropolitan    | Multicentre, prospective, observational, cohort study  | 1 April 2006–30 June 2007 | Patients hospitalised with community-acquired Legionnaires' disease, n=540                                                                                  | 60 [range, 17–100]                                                                            | Chest X-ray confirmed and laboratory evidence of <i>Legionella pneumophila</i> infection |
| Cillóniz 2011 [40]     | Spain; Barcelona        | Single-centre, prospective, observational cohort study | Jan 2003–Dec 2010         | Patients with CAP admitted to ICU, n=362                                                                                                                    | 63.4±16.5                                                                                     | Chest X-ray confirmed                                                                    |
| Cillóniz 2012 [41]     | Spain; Barcelona        | Single-centre, prospective, observational cohort study | 2001–2009                 | Adult patients hospitalised with pneumococcal pneumonia, n=626                                                                                              | 63.6±18.9<br>46% ≤65 yrs                                                                      | Clinical symptoms, chest X-ray confirmed and microbiological data                        |
| Curran 2008 [25]       | Spain; Barcelona        | Single-centre, prospective, observational cohort study | Jan 2000–Dec 2005         | HIV patients ≥18 yrs hospitalised with bacterial pneumonia, n=161; 186 episodes                                                                             | 39.7±7.8                                                                                      | Clinical symptoms, chest X-ray confirmed and response to antibacterial therapy           |
| de Roux 2006 [10]      | Spain; Barcelona        | Single-centre, prospective, observational cohort study | Oct 1996–Nov 2001         | Patients hospitalised with CAP, classified according to alcohol abuse status<br>Current, n=128<br>Former, n=54<br>None, n=1165                              | Current alcohol abuse, 58±14<br>Former alcohol abuse, 71±11<br>No alcohol abuse, 68±19        | Clinical symptoms, chest X-ray confirmed and microbiological data                        |
| Ewig 2009 [42]         | Germany; national (BQS) | Retrospective, observational study                     | 2005 and 2006             | Patients hospitalised with CAP, n=388,406                                                                                                                   | 2005, 71.94±16.86<br>2006, 72.09±17.00<br>[Median, 2005 & 2006, 76 (IQR, 2005, 20; 2006, 19)] | ICD-10 (German modification) codes                                                       |
| Falguera 2009 [43]     | Spain; Catalonia        | Two-centre, prospective, observational cohort study    | Jan 1995–Dec 2005         | Patients ≥18 yrs hospitalised with CAP, n=3272; 61 with Gram-negative infections; 3211 with non-Gram-negative infections                                    | 64 [range, 18–100]<br>Gram-negative infections, 69<br>Non-Gram-negative infections, 63        | Clinical symptoms, chest X-ray confirmed and microbiological data                        |
| Garcia-Vidal 2009 [44] | Spain; Barcelona        | Single-centre, prospective, observational cohort study | 1 Jan 1995–31 Dec 2005    | Patients hospitalised with CAP, n=1556; 146 with recurrent CAP (≥2 episodes of CAP in 3 yrs with asymptomatic period ≥1 month); 1410 with non-recurrent CAP | Recurrent CAP, 70.96±13.824<br>Non-recurrent CAP, 65.03±16.573                                | Clinical symptoms, chest X-ray confirmed and microbiological data                        |

| Reference            | Country; region                   | Study method                                                     | Study period                              | Population                                                                                                                 | Age (yrs [mean±SD])                                                                                                | Definition of CAP                                                                              |
|----------------------|-----------------------------------|------------------------------------------------------------------|-------------------------------------------|----------------------------------------------------------------------------------------------------------------------------|--------------------------------------------------------------------------------------------------------------------|------------------------------------------------------------------------------------------------|
| Giannella 2012 [45]  | Spain; national                   | Multicentre, prospective, observational cohort study             | Jan & Jun 2010 (1 week in each month)     | Patients ≥16 yrs treated for CAP in the internal medicine department, n=591                                                | Median, 77 [IQR 65–84]                                                                                             | Clinical symptoms, chest X-ray confirmed                                                       |
| Gulmez 2007 [46]     | Denmark; County of Funen          | Retrospective, observational, case-control study                 | 1 Jan 2000–31 Dec 2004                    | Patients with a discharge diagnosis of CAP<br>Cases, n=7642<br>Controls, n=34,176                                          | Cases, 55.5±31.2<br>Controls, 56.5±29.5                                                                            | ICD-10 codes                                                                                   |
| *Gutierrez 2005 [47] | Spain; Alicante                   | Single-centre, prospective, observational, cohort study          | 15 Oct 1999–14 Oct 2001                   | Patients ≥15 yrs with CAP, n=493                                                                                           | 56.6 [range, 15–94]                                                                                                | Clinical symptoms, chest X-ray confirmed and microbiological data                              |
| *Gutierrez 2006 [48] | Spain; Alicante                   | Single-centre, prospective, observational, cohort study          | 15 Oct 1999–14 Oct 2001                   | Patients ≥15 yrs with CAP, n=493                                                                                           | 56.6 [range, 15–94]                                                                                                | Clinical symptoms, chest X-ray confirmed and microbiological data                              |
| Hennessy 2007 [14]   | UK; England and Wales (GPRD)      | Nested, retrospective, observational, case-control study         | 1987–2002                                 | Patients ≥65 yrs hospitalised for pneumonia<br>Cases, n=12,044<br>Controls, n=48,176                                       | Cases:<br>Median, 81 [IQR, 74–86]<br>Controls:<br>Median, 75 [IQR, 70–81]                                          | Diagnostic codes (Read codes) within the UK GPRD                                               |
| Holm 2007 [49]       | Denmark; Odense                   | Multicentre, prospective, observational study                    | 9 Sept–1 Nov 2002;<br>6 Jan–25 April 2003 | Primary care patients ≥18 yrs with a diagnosis of community-acquired LRTI, n=364; 48 with pneumonia                        | Overall:<br>median, 50 [range 18–94]<br>Pneumonia:<br>median, 61 [range 22–88]                                     | GP diagnosis of LRTI; chest X-ray confirmed                                                    |
| Klapdor 2012 [50]    | Germany; national (CAPNETZ)       | Multicentre, prospective, observational study                    | Jan 2002–Jun 2009                         | Patients ≥18 yrs with CAP, n=7803; 4083 <65 yrs (2.6% nursing home residents); 3720 ≥65 yrs (14.4% nursing home residents) | Overall:<br>60.9±18.5 [range 18–101]<br><65 yrs:<br>Median, 47.0 [IQR 20.7]<br>≥65 yrs:<br>Median, 76.0 [IQR 11.8] | Clinical symptoms, chest X-ray confirmed and microbiological data                              |
| Kofteridis 2009 [34] | Greece; Crete                     | Single-centre, retrospective, observational study                | Jan 1996–Dec 2002                         | Adults hospitalised with community-acquired LRTI due to <i>Haemophilus influenzae</i><br>n=45                              | Median, 68 [range, 28–86]                                                                                          | Clinical symptoms, chest X-ray confirmed, and positive sputum culture for <i>H. influenzae</i> |
| Kornum 2008 [51]     | Denmark; North Jutland and Aarhus | Multicentre, retrospective, population-based, case-control study | 1997–2005                                 | Adults ≥15 yrs with discharge diagnoses of pneumonia, legionellosis and ornithosis                                         | Cases:<br>Median, 74; IQR 61–82<br>Controls:<br>Median, 74; IQR 61–82                                              | Hospital discharge diagnosis codes (ICD-10)                                                    |

| Reference          | Country; region                | Study method                                                                 | Study period        | Population                                                                                                                             | Age (yrs [mean±SD])                                                                                                                                          | Definition of CAP                                                 |
|--------------------|--------------------------------|------------------------------------------------------------------------------|---------------------|----------------------------------------------------------------------------------------------------------------------------------------|--------------------------------------------------------------------------------------------------------------------------------------------------------------|-------------------------------------------------------------------|
|                    |                                |                                                                              |                     | Cases, n=34,239<br>Controls, 342,390                                                                                                   |                                                                                                                                                              |                                                                   |
| **Kornum 2010 [17] | Denmark; Copenhagen and Aarhus | Multicentre, prospective, cohort study                                       | Dec 1993–April 2008 | Patients 50–64 yrs at enrolment hospitalised for pneumonia during median 11.8 yrs follow-up, n=48,551                                  | Cases and controls<br>Males:<br>50–54, 38% of cohort<br>55–59, 32%<br>60–64, 24%<br>≥65, 5%<br>Females:<br>50–54, 36%<br>55–59, 32%<br>60–64, 26%<br>≥65, 6% | Hospital discharge diagnosis codes (ICD-10)                       |
| **Kornum 2012 [18] | Denmark; Copenhagen and Aarhus | Multicentre, prospective, cohort study                                       | Dec 1993–April 2008 | Patients 50–64 yrs at enrolment hospitalised for pneumonia during median 11.8 yrs follow-up, n=47,167                                  | Median, 56 [5th–95th percentiles, 51–64]                                                                                                                     | Hospital discharge diagnosis codes (ICD-10)                       |
| Kothe 2008 [52]    | Germany; national (CAPNETZ)    | Multicentre, prospective, observational study                                | March 2003–Oct 2005 | Patients with CAP, n=2647; 1298 <65 yrs (3.3% nursing home residents); 1349 ≥65 yrs (15.2% nursing home residents)                     | <65 yrs, 47.2±12.7<br>≥65 yrs, 77.1±7.5                                                                                                                      | Clinical symptoms, chest X-ray confirmed and microbiological data |
| Le Moing 2006 [26] | France; national               | Multicentre, prospective, observational cohort study                         | May 1997–Dec 2001   | HIV patients receiving protease inhibitor therapy, n=1203; 29 hospitalised with pneumonia                                              | Median, 36                                                                                                                                                   | Clinical symptoms, chest X-ray confirmed and microbiological data |
| Liapikou 2012 [53] | Spain; Barcelona               | Single-centre, prospective, observational cohort study                       | 2004–2008           | Adult patients hospitalised with CAP, n=1379; 212 with COPD (5.7% nursing home residents); 1167 no COPD (10.2% nursing home residents) | Overall, 70±17<br>COPD, 73.4±8.8<br>No COPD, 69.4±17.9                                                                                                       | Clinical symptoms, chest X-ray confirmed and microbiological data |
| Madeddu 2008 [27]  | Italy; northern Sardinia       | Single-centre, observational, retrospective analysis of consecutive patients | Jan 1999–Dec 2004   | HIV patients hospitalised with CAP, n=76; 84 episodes                                                                                  | 38.3±7.5 [range, 27–80]                                                                                                                                      | Clinical symptoms, chest X-ray confirmed and microbiological data |
| **Manno 2009 [28]  | Italy; Brescia                 | Single-centre, prospective, observational, cohort study                      | June 2000–Dec 2006  | HIV patients hospitalised with CAP<br>Patients with cirrhosis, n=29                                                                    | Cirrhosis, 41.0±4.3<br>No cirrhosis, 37.3±6.2                                                                                                                | Clinical symptoms, chest X-ray confirmed and microbiological data |

| Reference            | Country; region                                 | Study method                                                               | Study period            | Population                                                                                                                                                                  | Age (yrs [mean±SD])                                                                                                                                                         | Definition of CAP                                                 |
|----------------------|-------------------------------------------------|----------------------------------------------------------------------------|-------------------------|-----------------------------------------------------------------------------------------------------------------------------------------------------------------------------|-----------------------------------------------------------------------------------------------------------------------------------------------------------------------------|-------------------------------------------------------------------|
| Migliorati 2006 [54] | Italy; Brescia                                  | Single-centre, observational, retrospective analysis                       | Jan 2001–Dec 2002       | Patients without cirrhosis, n=73<br>Patients ≥15 yrs hospitalised with discharge diagnosis of pneumonia or pneumonia-related disease, n=148 (20% nursing home residents)    | 70.3±17.3                                                                                                                                                                   | Chest X-ray confirmed                                             |
| Molinos 2009 [55]    | Spain; Asturias                                 | Multicentre, prospective, observational study                              | April 2003–April 2004   | Patients hospitalised with CAP, n=710; 244 with COPD; 466 no COPD (5% nursing home residents in both groups)                                                                | Overall, 67.14 [95% CI, 65.9–68.4]<br>With COPD, 73.7 [95% CI, 72.5–74.9]<br>No COPD, 63.6 [95% CI, 61.8–65.4]                                                              | Clinical symptoms, chest X-ray confirmed and microbiological data |
| Müllerova 2012 [19]  | UK; England and Wales (GPRD)                    | Multicentre, population-based, retrospective, observational, cohort study  | 1 Jan 1996–31 Dec 2005  | Patients ≥45 yrs with COPD, n=40,414                                                                                                                                        | 45–64, 37.1% of cohort<br>65–79, 49.9%<br>≥80, 13.3%                                                                                                                        | Diagnostic codes within the UK GPRD                               |
|                      |                                                 | Multicentre, population-based, nested, case–control study in COPD patients | 1 Jan 1996–31 Dec 2005  | Patients ≥45 yrs with COPD; 1469 with CAP; 7345 without CAP                                                                                                                 | With CAP, 75.1±10.6<br>No CAP, 70.9±10.8                                                                                                                                    |                                                                   |
| Myint 2011 [56]      | UK; national (2008 UK National COPD audit data) | Multicentre, retrospective, observational study                            | March–May 2008          | Patients hospitalised with acute exacerbations of COPD, n=9338; 1505 with pneumonia (7% residential home residents); 7833 without pneumonia (5% residential home residents) | Overall, 73±10<br>With pneumonia:<br><65, 14% of cohort<br>65–74, 28%<br>75–84, 42%<br>≥85, 16%<br>Without pneumonia:<br><65, 24%<br>65–74, 31%<br>75–84, 34%<br>≥85, 12%   | Chest X-ray confirmed                                             |
| Myles 2009 [22]      | UK; national (THIN)                             | Multicentre, retrospective, population-based, nested case–control study    | 1 July 2001–1 July 2002 | Primary care patients ≥40 yrs with pneumonia<br>Cases, n=3709<br>Controls, n=22,174                                                                                         | Cases:<br>40–49, 10.6% of cohort<br>50–59, 15.9%<br>60–69, 16.6%<br>70–79, 24.3%<br>≥80, 32.8%<br>Controls:<br>40–49, 10.6%<br>50–59, 16.0%<br>60–69, 16.6%<br>70–79, 24.3% | Database codes corresponding to ICD-9 codes                       |

| Reference            | Country; region              | Study method                                                                                                   | Study period              | Population                                                                                | Age (yrs [mean±SD])                                                                                                                                                             | Definition of CAP                                                 |
|----------------------|------------------------------|----------------------------------------------------------------------------------------------------------------|---------------------------|-------------------------------------------------------------------------------------------|---------------------------------------------------------------------------------------------------------------------------------------------------------------------------------|-------------------------------------------------------------------|
| Nielsen 2012 [57]    | Denmark; northern            | Multicentre, retrospective, population-based, observational, case-control study                                | 1 Jan 1997–12 Dec 2009    | Patients ≥15 yrs hospitalised with CAP<br>Cases, n=70,914<br>Controls, n=709,140          | ≥80, 32.5%<br>Median, 73<br>Cases and Controls:<br>15–39, 7.3% of cohort<br>40–64, 25.1%<br>65–79, 36.8%<br>≥80, 30.8%                                                          | ICD8/ICD10 classification                                         |
| Perez-Sola 2011 [58] | Spain; national (BIOBADASER) | Multicentre, prospective, observational, cohort study                                                          | Feb 2000–Jan 2006         | Patients with rheumatic diseases treated with TNF antagonists, n=6969; 101 with pneumonia | 50±14                                                                                                                                                                           | CDC criteria                                                      |
| Rodriguez 2009 [59]  | UK; national (THIN)          | Multicentre, cohort study with a nested case-control analysis using prospectively recorded data                | 1 Jan 2000–31 Dec 2005    | Primary care patients 20–79 yrs with CAP<br>Cases, n=7297<br>Controls, n=9993             | Cases and Controls:<br>20–49, 27% of cohort<br>50–59, 17%<br>60–69, 23%<br>70–79, 32%                                                                                           | Read codes for diagnosis of pneumonia                             |
| Ruiz 2010 [35]       | Spain; Basque country        | Single-centre, prospective, observational, cohort study                                                        | Jan 1995–Dec 2007         | Adults hospitalised with bacteraemic CAP due to Gram-negative bacteria, n=51              | 72.9±11.3                                                                                                                                                                       | Clinical symptoms, chest X-ray confirmed                          |
| Saindou 2008 [29]    | France; Lyon                 | Multicentre, prospective, observational, cohort study                                                          | 1993–2004                 | Patients with HIV before and after introduction of HAART, n=4075                          | 36.0±10.2                                                                                                                                                                       | Clinical symptoms, chest X-ray confirmed and microbiological data |
| Sarkar 2008 [60]     | UK; national (GPRD)          | Multicentre, observational, cohort study with a nested case-control analysis using prospectively recorded data | May 1987–April 2002       | Primary care patients ≥18 yrs with CAP<br>Cases, n=80,066<br>Controls, n=799,872          | Cases, 73.5±17.6<br>Controls, 49.5±18.3                                                                                                                                         | Read codes for diagnosis of pneumonia                             |
| Schlienger 2007 [21] | UK; national (GPRD)          | Multicentre, population-based, retrospective, nested case-control study                                        | 1 Jan 1995–30 April 2002  | Primary care patients ≥30 yrs with CAP<br>Cases, n=1253<br>Controls, n=4838               | Cases:<br>30–39, 2.4%<br>40–49, 8.6%<br>50–59, 15.2%<br>60–69, 28.4%<br>70–79, 45.3%<br>Controls:<br>30–39, 2.7%<br>40–49, 8.6%<br>50–59, 15.5%<br>60–69, 29.6%<br>70–79, 43.6% | Read codes for diagnosis of pneumonia                             |
| Schnoor 2007 [61]    | Germany; national (CAPNETZ)  | Multicentre, prospective, population-based, case-control study                                                 | 1 June 2002–30 April 2005 | Patients >18 yrs with CAP<br>Cases, n=1137 (1.7%)                                         | Cases, 57.0±17.1<br>Controls, 57.5±17.2                                                                                                                                         | Chest X-ray or clinical symptoms                                  |

| Reference              | Country; region                    | Study method                                                                         | Study period           | Population                                                                                                               | Age (yrs [mean±SD])                                                                                                                                                                    | Definition of CAP                                                         |
|------------------------|------------------------------------|--------------------------------------------------------------------------------------|------------------------|--------------------------------------------------------------------------------------------------------------------------|----------------------------------------------------------------------------------------------------------------------------------------------------------------------------------------|---------------------------------------------------------------------------|
|                        |                                    |                                                                                      |                        | care home residents)<br>Controls, n=1044<br>(1.3% care home residents)                                                   |                                                                                                                                                                                        |                                                                           |
| Sopena 2007 [32]       | Spain; Barcelona                   | Single-centre, prospective, observational, cohort study                              | 1994–2004              | Adult patients hospitalised with community-acquired Legionnaires' disease, n=251; 138 sporadic cases; 113 outbreak cases | Sporadic cases, 56.6±15.5<br>Outbreak cases, 59.5±16.6                                                                                                                                 | Laboratory evidence of acute infection with <i>Legionella pneumophila</i> |
| Sopena 2007 [33]       | Spain; Barcelona                   | Single-centre, retrospective, observational, cohort study                            | 1994–2004              | Patients hospitalised with CAP due to <i>L. pneumophila</i> , n=158; 104 <65 yrs; 54 ≥65 yrs                             | <65, 65.9% of cohort<br>≥65, 34.1%<br>≥70, 13.9%<br>≥85, 1.9%                                                                                                                          | Laboratory evidence of infection with <i>L. pneumophila</i>               |
| Teepe 2010 [23]        | The Netherlands; Utrecht           | Multicentre, prospective, population-based, case-control study                       | April 1999–Dec 2008    | Primary care patients 16–40 yrs with CAP<br>Cases, n=156<br>Controls, n=468                                              | Cases, 34.3±4.4<br>Controls, 32.1±5.5                                                                                                                                                  | Chest X-ray or clinical symptoms                                          |
| Thomsen 2008 [62]      | Denmark; Aarhus and North Jutland  | Multicentre, retrospective, population-based, observational, cohort study            | 1 Jan 1997–31 Dec 2004 | Patients ≥15 yrs hospitalised with CAP, n=29,900; 1372 statin users; 28,528 statin non-users                             | Median, 73 [IQR 60–81]<br>Statin users:<br>15–39, 0.4%<br>40–64, 30.8%<br>65–79, 56.9%<br>≥80, 12.0%<br>Statin non-users:<br>15–39, 7.9%<br>40–64, 23.0%<br>65–79, 37.6%<br>≥80, 31.5% | Hospital discharge diagnosis                                              |
| Trifiro 2010 [15]      | The Netherlands; national (IPCI)   | Multicentre, prospective, observational, population-based, nested case-control study | 1 Jan 1996–31 Dec 2006 | Patients ≥65 yrs with a first antipsychotic drug prescription, n=2560<br>Cases, n=258<br>Controls, n=1686                | Cases, 83.6±7.4<br>Controls, 83.2±5.9                                                                                                                                                  | Database codes; chest X-ray or clinical symptoms                          |
| van de Garde 2006 [63] | The Netherlands; national (PHARMO) | Multicentre, prospective, observational, population-based, case-control study        | 1 Jan 1995–31 Dec 2000 | Patients >18 yrs hospitalised with a discharge diagnosis of CAP<br>Cases, n=1108<br>Controls, n=3817                     | Mean±SEM, 67±0.51<br>Cases:<br><40, 8.9% of cohort<br>40–49, 8.2%<br>50–59, 10.5%<br>60–69, 17.1%<br>70–79, 31.9%                                                                      | Hospital discharge diagnosis (ICD-9 codes)                                |

| Reference               | Country; region            | Study method                                                     | Study period              | Population                                                                                                                                                                                           | Age (yrs [mean±SD])                                                                                                                                                                 | Definition of CAP                                          |
|-------------------------|----------------------------|------------------------------------------------------------------|---------------------------|------------------------------------------------------------------------------------------------------------------------------------------------------------------------------------------------------|-------------------------------------------------------------------------------------------------------------------------------------------------------------------------------------|------------------------------------------------------------|
|                         |                            |                                                                  |                           |                                                                                                                                                                                                      | 80–89, 19.7%<br>≥90, 3.7%<br>Controls:<br><40, 10.3%<br>40–49, 9.2%<br>50–59, 12.1%<br>60–69, 16.7%<br>70–79, 27.5%<br>80–89, 20.9%<br>≥90, 3.3%                                    |                                                            |
| †van de Garde 2006 [64] | UK; England & Wales (GPRD) | Multicentre, retrospective, population-based, case–control study | 1 June 1987–21 Jan 2001   | Primary care patients ≥18 yrs with diabetes mellitus<br>Cases, n=4719<br>Controls, n=15,322                                                                                                          | Cases:<br><60, 11.1% of cohort<br>60–69, 16.6%<br>70–79, 32.5%<br>80–89, 34.4%<br>≥90, 5.4%<br>Controls:<br><60, 11.6%<br>60–69, 20.0%<br>70–79, 37.0%<br>80–89, 28.9%<br>≥90, 2.5% | Read codes                                                 |
| †van de Garde 2007 [65] | UK; England & Wales (GPRD) | Multicentre, retrospective, population-based, case–control study | 1 June 1987–21 Jan 2001   | Primary care patients ≥18 yrs with diabetes mellitus<br>Cases, n=4719<br>Controls, n=15,322                                                                                                          | Cases:<br><60, 11.1% of cohort<br>60–69, 16.6%<br>70–79, 32.5%<br>80–89, 34.4%<br>≥90, 5.4%<br>Controls:<br><60, 11.6%<br>60–69, 20.0%<br>70–79, 37.0%<br>80–89, 28.9%<br>≥90, 2.5% | Read codes                                                 |
| Viasus 2011 [66]        | Spain; Barcelona           | Single-centre, prospective, observational, cohort study          | 13 Feb 1995–30 April 2010 | Adult patients with and without chronic renal disease, hospitalised with CAP, n=3800; 203 with renal disease (8.6% nursing home residents); 3597 with no renal disease (8.1% nursing home residents) | Renal disease:<br>Median, 77 [IQR, 67–84]<br>No renal disease:<br>Median, 70 [IQR, 56–79]                                                                                           | Chest X-ray and clinical symptoms and microbiological data |



| Reference               | Country; region                     | Study method                                                             | Study period             | Population                                                                                                                                        | Age (yrs [mean±SD])                                                                                                                                                                                                 | Definition of CAP                 |
|-------------------------|-------------------------------------|--------------------------------------------------------------------------|--------------------------|---------------------------------------------------------------------------------------------------------------------------------------------------|---------------------------------------------------------------------------------------------------------------------------------------------------------------------------------------------------------------------|-----------------------------------|
| Viasus 2011 [67]        | Spain; Barcelona                    | Single centre, prospective, observational, cohort study                  | 13 Feb 1995–31 Dec 2008  | Patients with and without cirrhosis, hospitalised with CAP, n=3420; 90 with cirrhosis; 3330 with no cirrhosis                                     | Cirrhosis, 61.8±13.0<br>No cirrhosis, 66.8±16.9                                                                                                                                                                     | Chest X-ray and clinical symptoms |
| ††Viegi 2006 [68]       | Italy, national                     | Multicentre, prospective, observational, population-based study          | 15 Feb 1999–14 Feb 2000  | Primary care patients with CAP, n=699; 548 diagnosed by GP (4.7% nursing home residents); 151 diagnosed by hospital (8.9% nursing home residents) | 59.6±19.5<br>Patients diagnosed in community, 57.6±19.2<br>Patients diagnosed in hospital, 66.7±18.7<br>[10 patients in overall population were aged ≤14 yrs]                                                       | Chest X-ray and clinical symptoms |
| Vila-Corcoles 2009 [16] | Spain; Tarragona                    | Multicentre, prospective, observational, population-based, cohort study  | 1 Jan 2002–30 April 2005 | Community-dwelling individuals ≥65 yrs, n=11,241                                                                                                  | 65–74, 55.2% of cohort<br>75–84, 34.3%<br>≥85, 10.5%                                                                                                                                                                | Chest X-ray and clinical symptoms |
| ‡Vinogradova 2009 [69]  | UK; national (QRESEARCH database)‡‡ | Multicentre, retrospective, population-based, nested, case-control study | 1 Jan 1996–31 Dec 2005   | Primary care patients<br>Cases, n=17,172<br>Controls, n=71,399                                                                                    | Cases:<br>0–4, 17.2% of cohort<br>5–14, 4.7%<br>15–44, 12.7%<br>45–64, 18.2%<br>65–74, 15.5%<br>≥75, 31.8%<br>Controls:<br>0–4, 19.5%<br>5–14, 4.2%<br>15–44, 10.4%<br>45–64, 18.1%<br>65–74, 16.2%<br>≥75, 31.5%   | Database codes (Read codes)       |
| Vinogradova 2011 [20]   | UK; national (QRESEARCH database)‡  | Multicentre, retrospective, population-based, nested, case-control study | 1 Jan 1996–31 Dec 2005   | Primary care patients ≥45 yrs<br>Cases, n=17,755<br>Controls, n=80,484                                                                            | Cases:<br>Median, 74 [IQR 62–82]<br>45–54, 12.3% of cohort<br>55–64, 16.3%<br>65–74, 20.9%<br>75–84, 29.9%<br>≥85, 20.6%<br>Controls:<br>45–54, 12.5%<br>55–64, 16.7%<br>65–74, 21.7%<br>75–84, 30.8%<br>≥85, 18.4% | Database codes (Read codes)       |

| Reference          | Country; region             | Study method                                  | Study period             | Population                                                                                                          | Age (yrs [mean±SD])                                                   | Definition of CAP                |
|--------------------|-----------------------------|-----------------------------------------------|--------------------------|---------------------------------------------------------------------------------------------------------------------|-----------------------------------------------------------------------|----------------------------------|
| Von Baum 2010 [70] | Germany; national (CAPNETZ) | Multicentre, prospective, observational study | 1 June 2002–30 June 2007 | Patients with CAP, n=5130 (6% nursing home residents); 67 with EB; 22 with PA; 1833 patients with no definite EB/PA | Overall, 60±18<br>With EB, 73±15<br>With PA, 64±17<br>No EB/PA, 58±18 | Chest X-ray or clinical symptoms |

BQS, The National Institute for Quality in Healthcare database; CAP, community-acquired pneumonia; CAPNETZ, Competence Network for Community-Acquired Pneumonia; CDC, Centers for Disease Control; COPD, chronic obstructive pulmonary disease; EB, Enterobacteriaceae; GP, General Practitioner; GPRD, General Practice Research Database; HAART, highly active antiretroviral therapy; HIV, human immunodeficiency virus; ICD, International Classification of Diseases; ICU, intensive care unit; IPCI, Integrated Primary Care Information; IQR, interquartile range; LRTI, lower respiratory tract infection; PA, *Pseudomonas aeruginosa*; SD, standard deviation; SEM, standard error of the mean; THIN, The Health Improvement Network; TNF, tumour necrosis factor; yr/yrs, year/years.

\*Different analyses relating to the same population; †Different analyses in the same population; ††Different analyses relating to the same population; \*\*This paper refers to patients with cirrhosis as 'Cases' and those without cirrhosis as 'Controls'. However, there is no evidence of any matching of 'cases' and 'controls'; ††10 patients in this study were aged ≤14 years; ‡This study included patients of all ages; data for risk factors were only presented for the total population. In addition, 0.2% of cases had a diagnosis of 'postoperative pneumonia'. ††The QRESEARCH database gathers anonymised patient data from >500 general practices in the UK that use the Egton Medical Information Systems clinical computer system.

**Supplementary Table S2.** Incidence of community-acquired pneumonia (CAP) in adults in Europe.

| Study                     | Country; region   | Study period             | CAP incidence (95% CI)                                                                                                                                                |  | Hazard ratio (95% CI) | CAP incidence (95% CI)    |                                                                           |
|---------------------------|-------------------|--------------------------|-----------------------------------------------------------------------------------------------------------------------------------------------------------------------|--|-----------------------|---------------------------|---------------------------------------------------------------------------|
|                           |                   |                          | Original study data                                                                                                                                                   |  |                       | Standardised <sup>+</sup> |                                                                           |
| <i>Overall population</i> |                   |                          |                                                                                                                                                                       |  |                       |                           |                                                                           |
| Almirall 2008 [36]        | Spain; east coast | 1 Nov 1999–30 Nov 2000   | Per 1000 population >14 yrs: 1.54                                                                                                                                     |  |                       |                           |                                                                           |
| Gutierrez 2006 [48]       | Spain; Alicante   | 15 Oct 1999–14 Oct 2001  | Per 10,000 person-yrs:<br>Overall, 12.30<br>15–44 yrs, 6.77<br>45–64 yrs, 10.83<br>65–74 yrs, 23.73<br>≥75 yrs, 52.62<br>Males, 15.56<br>Females, 9.11                |  |                       |                           | 1.230<br>0.677<br>1.083<br>2.373<br>5.262<br>1.556<br>0.911               |
|                           |                   |                          | Incidence due to <i>S. pneumoniae</i> per 10,000 person-yrs:<br>Overall, 2.07 (1.66–2.58)                                                                             |  |                       |                           |                                                                           |
|                           |                   |                          | 15–44 yrs, 0.97<br>45–64 yrs, 1.69<br>65–74 yrs, 4.64<br>≥75 yrs, 10.06<br>Males, 2.38<br>Females, 1.77                                                               |  |                       |                           | 0.207 (0.166–0.258)<br>0.097<br>0.169<br>0.464<br>1.006<br>0.238<br>0.177 |
| Rodriguez 2009 [59]       | UK; national      | 1 Jan 2000–31 Dec 2005   | Primary care patients, per 10,000 person-yrs:<br>Overall, 10.7 (10.4–10.9)<br><br>Women, 9.3 (8.9–9.6)<br>Men, 12.2 (11.8–12.6)                                       |  |                       |                           | 1.07 (1.04–1.09)<br>0.93 (0.89–0.96)<br>1.22 (1.18–1.26)                  |
| *Viegi 2006 [68]          | Italy; national   | 15 Feb 1999–14 Feb 2000  | Annual incidence per 1000 population:<br>Overall, 1.703<br>Males, 1.692<br>Females, 1.713<br>≤14 yrs, 0.734<br>15–44 yrs, 0.915<br>45–64 yrs, 1.627<br>>64 yrs, 3.338 |  |                       |                           |                                                                           |
| Vila-Corcoles 2009 [16]   | Spain; Tarragona  | 1 Jan 2002–30 April 2005 | Age ≥65 yrs, per 1000 person-yrs:<br>Overall, 14.0 (12.7–15.3)<br>65–74 yrs, 10.0 (8.6–11.4)<br>75–84 yrs, 16.9 (14.6–19.4)                                           |  |                       |                           |                                                                           |

| Study                                 | Country;<br>region                   | Study<br>period               | CAP incidence (95% CI)                                                                                                                                                                                                                                                                                                                                                                                                                                                          | Hazard ratio<br>(95% CI) | CAP incidence (95% CI)                                      |
|---------------------------------------|--------------------------------------|-------------------------------|---------------------------------------------------------------------------------------------------------------------------------------------------------------------------------------------------------------------------------------------------------------------------------------------------------------------------------------------------------------------------------------------------------------------------------------------------------------------------------|--------------------------|-------------------------------------------------------------|
|                                       |                                      |                               | Original study data                                                                                                                                                                                                                                                                                                                                                                                                                                                             |                          | Standardised <sup>†</sup>                                   |
|                                       |                                      |                               | ≥85 yrs, 29.4 (23.5–36.2)<br>Men, 19.2 (17.1–21.6)<br>Women, 10.0 (8.6–11.5)<br>Chronic lung disease, 46.5 (40.0–53.9)<br>Chronic heart disease, 25.5 (20.8–30.9)<br>Diabetes mellitus, 15.0 (12.4–17.9)<br>Smoking, 20.7 (15.8–26.7)<br>Cancer, 29.2 (18.8–43.2)<br>Chronic liver disease, 31.3 (19.0–48.5)<br>Chronic renal disease, 27.2 (18.7–38.1)<br>Corticosteroid therapy, 40.1 (31.9–49.6)<br>Immunocompetent, 11.6 (10.4–12.9)<br>Immunocompromised, 30.9 (25.8–36.6) |                          |                                                             |
| <b><i>Hospitalisation for CAP</i></b> |                                      |                               |                                                                                                                                                                                                                                                                                                                                                                                                                                                                                 |                          |                                                             |
| Bewick 2012<br>[38]                   | UK;<br>Nottingham                    | Sept<br>2008–<br>Sept<br>2010 | Per 100,000 population ≥16 yrs:<br>Overall, 109.7<br>16–24 yrs, 15.8<br>25–44 yrs, 31.7<br>45–64 yrs, 49.8<br>65–74 yrs, 288.4<br>75–84 yrs, 438.5<br>≥85 yrs, 985.9                                                                                                                                                                                                                                                                                                            |                          | 1.097<br>0.158<br>0.317<br>0.498<br>2.884<br>4.385<br>9.859 |
| Ewig 2009<br>[42]                     | Germany;<br>national                 | 2005 and<br>2006              | Per 1000 population/yr ≥18 yrs:<br>2005, 2.75<br>2006, 2.96<br>18–19 yrs, 0.33<br>20–29 yrs, 0.44<br>30–39 yrs, 0.63<br>40–49 yrs, 0.77<br>50–59 yrs, 1.34<br>60–69 yrs, 2.98<br>70–79 yrs, 7.39<br>80–89 yrs, 17.62<br>≥90 yrs, 35.81<br>Mean incidence:<br>Males, 3.21<br>Females, 2.52                                                                                                                                                                                       |                          |                                                             |
| Kornum 2010<br>[17]                   | Denmark;<br>Copenhagen<br>and Aarhus | Dec<br>1993–<br>April<br>2008 | Per 1000 person-yrs, >50 yrs:<br>Men, 4.2<br>BMI group (kg/m <sup>2</sup> ):<br><22.5                      5.2                                                                                                                                                                                                                                                                                                                                                                  |                          |                                                             |

| Study                     | Country;<br>region                   | Study<br>period               | CAP incidence (95% CI)          |      | Hazard ratio<br>(95% CI) | CAP incidence (95% CI)    |  |
|---------------------------|--------------------------------------|-------------------------------|---------------------------------|------|--------------------------|---------------------------|--|
|                           |                                      |                               | Original study data             |      |                          | Standardised <sup>†</sup> |  |
|                           |                                      |                               | 22.5–24.9                       | 3.6  | 1.4 (1.1–1.7)            |                           |  |
|                           |                                      |                               | 25.0–29.9                       | 3.9  | 1.0 (reference)          |                           |  |
|                           |                                      |                               | 30.0–34.9                       | 5.4  | 1.0 (0.8–1.1)            |                           |  |
|                           |                                      |                               | ≥35                             | 7.0  | 1.0 (0.8–1.3)            |                           |  |
|                           |                                      |                               |                                 |      | 1.2 (0.8–1.7)            |                           |  |
|                           |                                      |                               | Women, 3.4                      |      |                          |                           |  |
|                           |                                      |                               | BMI group (kg/m <sup>2</sup> ): |      |                          |                           |  |
|                           |                                      |                               | <22.5                           | 4.0  | 1.2 (1.0–1.4)            |                           |  |
|                           |                                      |                               | 22.5–24.9                       | 3.4  | 1.0 (reference)          |                           |  |
|                           |                                      |                               | 25.0–29.9                       | 3.0  | 0.8 (0.7–1.0)            |                           |  |
|                           |                                      |                               | 30.0–34.9                       | 2.9  | 0.7 (0.6–0.9)            |                           |  |
|                           |                                      |                               | ≥35                             | 4.3  | 0.8 (0.6–1.1)            |                           |  |
| Kornum 2012<br>[18]       | Denmark;<br>Copenhagen<br>and Aarhus | Dec<br>1993–<br>April<br>2008 | Per 1000 person-yrs, >50 yrs:   |      |                          |                           |  |
|                           |                                      |                               | Men, 4.25                       |      |                          |                           |  |
|                           |                                      |                               | Alcohol (drinks/week):          |      |                          |                           |  |
|                           |                                      |                               | 0                               | 7.02 | 1.40 (0.93–2.12)         |                           |  |
|                           |                                      |                               | 1–6                             | 4.45 | 1.0 (reference)          |                           |  |
|                           |                                      |                               | 7–20                            | 3.67 | 0.94 (0.80–1.10)         |                           |  |
|                           |                                      |                               | 21–34                           | 3.79 | 0.90 (0.75–1.09)         |                           |  |
|                           |                                      |                               | 35–50                           | 5.34 | 1.14 (0.91–1.43)         |                           |  |
|                           |                                      |                               | >50                             | 9.16 | 1.45 (1.11–1.90)]        |                           |  |
|                           |                                      |                               | Women, 3.28                     |      |                          |                           |  |
|                           |                                      |                               | Alcohol (drinks/week):          |      |                          |                           |  |
|                           |                                      |                               | 0                               | 4.72 | 1.17 (0.82–1.68)         |                           |  |
|                           |                                      |                               | 1–6                             | 3.18 | 1.0 (reference)          |                           |  |
|                           |                                      |                               | 7–20                            | 3.19 | 1.03 (0.89–1.19)         |                           |  |
|                           |                                      |                               | 21–35                           | 4.03 | 1.08 (0.86–1.36)         |                           |  |
|                           |                                      |                               | >35                             | 2.25 | 0.48 (0.25–0.93)]        |                           |  |
| <b>Patients with COPD</b> |                                      |                               |                                 |      |                          |                           |  |
| Müllerova<br>2012 [19]    | UK; England<br>and Wales             | 1 Jan<br>1996–31<br>Dec 2005  | Per 1000 patient-yrs:           |      |                          |                           |  |
|                           |                                      |                               | Overall, 22.4 (21.7–23.2)       |      |                          |                           |  |
|                           |                                      |                               | Women, 21.4 (20.4–22.5)         |      |                          |                           |  |
|                           |                                      |                               | Men, 23.1 (22.1–24.2)           |      |                          |                           |  |
|                           |                                      |                               | Age (yrs)                       |      |                          |                           |  |
|                           |                                      |                               | 45–64, 11.3 (10.3–12.3)         |      |                          |                           |  |
|                           |                                      |                               | 65–79, 19.8 (18.9–20.8)         |      |                          |                           |  |
|                           |                                      |                               | ≥80, 46.1 (43.7–48.6)           |      |                          |                           |  |
|                           |                                      |                               | Smoking                         |      |                          |                           |  |
|                           |                                      |                               | Current, 19.8 (18.7–21.0)       |      |                          |                           |  |
|                           |                                      |                               | Former, 21.4 (20.2–22.8)        |      |                          |                           |  |
|                           |                                      |                               | Non-smoker, 26.0 (24.3–27.8)    |      |                          |                           |  |
|                           |                                      |                               | Unknown, 28.7 (25.9–31.9)       |      |                          |                           |  |

| Study                                       | Country;<br>region             | Study<br>period          | CAP incidence (95% CI)                                                                                                            |                           | Hazard ratio<br>(95% CI) | CAP incidence (95% CI) |
|---------------------------------------------|--------------------------------|--------------------------|-----------------------------------------------------------------------------------------------------------------------------------|---------------------------|--------------------------|------------------------|
|                                             |                                |                          | Original study data                                                                                                               | Standardised <sup>†</sup> |                          |                        |
|                                             |                                |                          | Asthma history                                                                                                                    |                           |                          |                        |
|                                             |                                |                          | Yes, 26.1 (24.4–27.9)                                                                                                             |                           |                          |                        |
|                                             |                                |                          | No, 21.2 (20.4–22.1)                                                                                                              |                           |                          |                        |
|                                             |                                |                          | Prior pneumonia                                                                                                                   |                           |                          |                        |
|                                             |                                |                          | Yes, 39.5 (35.4–44.1)                                                                                                             |                           |                          |                        |
|                                             |                                |                          | No, 21.4 (20.6–22.1)                                                                                                              |                           |                          |                        |
|                                             |                                |                          | COPD severity                                                                                                                     |                           |                          |                        |
|                                             |                                |                          | Mild, 18.2 (15.7–21.2)                                                                                                            |                           |                          |                        |
|                                             |                                |                          | Moderate, 19.2 (18.4–20.0)                                                                                                        |                           |                          |                        |
|                                             |                                |                          | Severe, 35.9 (33.8–38.1)                                                                                                          |                           |                          |                        |
| <b><i>Immunocompromised individuals</i></b> |                                |                          |                                                                                                                                   |                           |                          |                        |
| †Perez-Sola<br>2011 [58]                    | Spain;<br>national             | Feb<br>2000–Jan<br>2006  | Patients with rheumatic diseases treated with TNF antagonists, per 1000 patient-yrs:<br>5.97 (4.87–7.25)                          |                           |                          |                        |
| <b><i>HIV-infected individuals</i></b>      |                                |                          |                                                                                                                                   |                           |                          |                        |
| Bénard 2010<br>[24]                         | France;<br>Aquitaine           | 2000–<br>2007            | Per 1000 patient-yrs:<br>Overall: 12.0 (9.9–14.0)                                                                                 |                           |                          |                        |
|                                             |                                |                          | Smoking:                                                                                                                          |                           |                          |                        |
|                                             |                                |                          | Current, 15.9 (13.1–19.3)                                                                                                         |                           | 1.00 (reference)         |                        |
|                                             |                                |                          | Former, 7.9 (4.2–14.9)                                                                                                            |                           | 0.48 (0.26–0.90)         |                        |
|                                             |                                |                          | Never, 5.9 (3.5–10.0)                                                                                                             |                           | 0.50 (0.29–0.86)         |                        |
|                                             |                                |                          | CD4+ lymphocyte count (cells/μL):                                                                                                 |                           |                          |                        |
|                                             |                                |                          | ≥500, 7.9 (5.8–10.8)                                                                                                              |                           | 1.00 (reference)         |                        |
|                                             |                                |                          | 350–499, 7.4 (3.9–13.7)                                                                                                           |                           | 0.93 (0.54–1.60)         |                        |
|                                             |                                |                          | 200–349, 16.5 (9.5–28.4)                                                                                                          |                           | 1.98 (1.25–3.15)         |                        |
|                                             |                                |                          | <200, 28.8 (16.7–49.8)                                                                                                            |                           | 2.98 (1.80–4.94)         |                        |
| Curran 2008<br>[25]                         | Spain;<br>Barcelona            | Jan<br>2000–<br>Dec 2005 | Cases/100,000 patients/yr:                                                                                                        |                           |                          |                        |
|                                             |                                |                          | 2000, 3090                                                                                                                        |                           |                          | 30.90                  |
|                                             |                                |                          | 2001, 3180                                                                                                                        |                           |                          | 31.80                  |
|                                             |                                |                          | 2002, 2570                                                                                                                        |                           |                          | 25.70                  |
|                                             |                                |                          | 2003, 2190                                                                                                                        |                           |                          | 21.90                  |
|                                             |                                |                          | 2004, 2050                                                                                                                        |                           |                          | 20.50                  |
|                                             |                                |                          | 2005, 2400                                                                                                                        |                           |                          | 24.00                  |
| Le Moing<br>2006 [26]                       | France;<br>national            | May<br>1997–<br>Dec 2001 | Hospitalisation for first episode of bacterial pneumonia in protease inhibitor-treated patients:<br>0.8/100 patient-yrs (0.3–1.3) |                           |                          |                        |
|                                             |                                |                          |                                                                                                                                   |                           |                          | 8 (3–13)               |
| ‡Madeddu<br>2008 [27]                       | Italy;<br>northern<br>Sardinia | Jan<br>1999–<br>Dec 2004 | Per 100 inpatients/yr:<br>1999, 17.7<br>2004, 28.0                                                                                |                           |                          | 177<br>280             |
| Saindou 2008                                | France; Lyon                   | 1993–                    | Pneumococcal pneumonia, per 1000 patient-yrs:                                                                                     |                           |                          |                        |

| Study | Country;<br>region | Study<br>period | CAP incidence (95% CI)                                                                                                                                                                                           |                           |
|-------|--------------------|-----------------|------------------------------------------------------------------------------------------------------------------------------------------------------------------------------------------------------------------|---------------------------|
|       |                    |                 | Original study data                                                                                                                                                                                              | Standardised <sup>†</sup> |
| [29]  |                    | 2004            | Cohort followed 1993–1 July 1996 (pre-HAART), 10.6 (5.4–15.7)<br>Cohort followed before 1 July 1996–2004 (pre-HAART and HAART era), 1.5 (0.9–2.1)<br>Cohort followed 1 July 1996–2004 (HAART era), 2.5 (1.4–3.6) |                           |

BMI, body mass index; CI, confidence interval; COPD, chronic obstructive pulmonary disease; HAART, highly active antiretroviral therapy; HIV, human immunodeficiency virus; *S. pneumoniae*, *Streptococcus pneumoniae*; TNF, tumour necrosis factor; yr/yrs, year/years

<sup>†</sup> Incidence rates standardised per 1000 population or per 1000 person-years; \*This study included data for 10 children aged <14 years; †In this study, 'pneumonia' included fungal and viral aetiologies; ‡A majority of patients (84%) in this study were also intravenous drug users

**Supplementary Table S3.** Risk factors identified in case–control studies of lifestyle factors and the risk of community-acquired pneumonia (CAP).

| Citation                                                 | Study type                                 | Definition of cases                               | Definition of controls                                                                                                                | Risk factor(s)                             |          |             |                           |                  |  |
|----------------------------------------------------------|--------------------------------------------|---------------------------------------------------|---------------------------------------------------------------------------------------------------------------------------------------|--------------------------------------------|----------|-------------|---------------------------|------------------|--|
|                                                          |                                            |                                                   |                                                                                                                                       | Factor                                     | Cases, % | Controls, % | Crude Odds ratio (95% CI) | Adjusted         |  |
| Almirall 2008 [36]                                       | Multicentre, prospective, population-based | Primary care patients with CAP n=1336             | Randomly selected from primary care centres; matched 1:1 by sex, age ( $\pm 5$ yrs) and primary care centre n=1326                    | Body mass index                            |          |             |                           |                  |  |
|                                                          |                                            |                                                   |                                                                                                                                       | Normal                                     | 64.0     | 64.5        | 1.00 (ref)                |                  |  |
|                                                          |                                            |                                                   |                                                                                                                                       | Underweight                                | 9.6      | 4.4         | 2.20 (1.57–3.09)          |                  |  |
|                                                          |                                            |                                                   |                                                                                                                                       | Overweight                                 | 17.8     | 20.2        | 0.89 (0.72–1.09)          |                  |  |
|                                                          |                                            |                                                   |                                                                                                                                       | Obese                                      | 8.6      | 10.9        | 0.79 (0.60–1.04)          |                  |  |
|                                                          |                                            |                                                   |                                                                                                                                       | Smoking                                    |          |             |                           |                  |  |
|                                                          |                                            |                                                   |                                                                                                                                       | Never                                      | 41.0     | 48.5        | 1.00 (ref)                |                  |  |
|                                                          |                                            |                                                   |                                                                                                                                       | Current smoker                             | 31.7     | 27.4        | 1.37 (1.14–1.64)          |                  |  |
|                                                          |                                            |                                                   |                                                                                                                                       | Ex-smoker                                  | 27.3     | 24.1        | 1.34 (1.11–1.62)          |                  |  |
|                                                          |                                            |                                                   |                                                                                                                                       | Alcohol intake in males, g/day             |          |             |                           |                  |  |
|                                                          |                                            |                                                   |                                                                                                                                       | 0                                          | 33.8     | 34.1        | 1.00 (ref)                |                  |  |
|                                                          |                                            |                                                   |                                                                                                                                       | 0.1–20                                     | 41.3     | 43.7        | 0.95 (0.75–1.21)          |                  |  |
|                                                          |                                            |                                                   |                                                                                                                                       | 21–40                                      | 12.9     | 14.8        | 0.88 (0.63–1.22)          |                  |  |
|                                                          |                                            |                                                   |                                                                                                                                       | 41–80                                      | 8.3      | 5.9         | 1.42 (0.92–2.21)          |                  |  |
|                                                          |                                            |                                                   |                                                                                                                                       | >80                                        | 3.7      | 1.6         | 2.34 (1.13–4.85)          |                  |  |
|                                                          |                                            |                                                   |                                                                                                                                       | Education level                            |          |             |                           |                  |  |
|                                                          |                                            |                                                   |                                                                                                                                       | Low                                        | 37.7     | 33.4        | 1.00 (ref)                |                  |  |
|                                                          |                                            |                                                   |                                                                                                                                       | Middle                                     | 40.6     | 42.2        | 0.86 (0.72–1.01)          |                  |  |
|                                                          |                                            |                                                   |                                                                                                                                       | High                                       | 21.7     | 24.5        | 0.78 (0.64–0.96)          |                  |  |
|                                                          |                                            |                                                   |                                                                                                                                       | Contact with animals, excrement or viscera | 11.5     | 9.0         | 1.78 (1.00–3.19)          |                  |  |
| Sudden temperature changes in the workplace <sup>a</sup> | 8.7                                        | 2.8                                               | 3.28 (2.24–4.82)                                                                                                                      | 2.64 (1.67–4.15)                           |          |             |                           |                  |  |
| Living with >10 persons at home                          | 2.6                                        | 1.2                                               | 2.20 (1.21–4.00)                                                                                                                      |                                            |          |             |                           |                  |  |
| Usual contact with children                              | 35.4                                       | 27.0                                              | 1.48 (1.26–1.75)                                                                                                                      | 1.48 (1.20–1.82)                           |          |             |                           |                  |  |
| Contact with pets <sup>b</sup>                           | 50.6                                       | 42.8                                              | 1.37 (1.18–1.60)                                                                                                                      |                                            |          |             |                           |                  |  |
| Dental dysaesthesia                                      | 23.3                                       | 19.7                                              | 1.24 (1.01–1.53)                                                                                                                      |                                            |          |             |                           |                  |  |
| Dental prosthesis                                        | 45.6                                       | 40.8                                              | 1.22 (1.04–1.42)                                                                                                                      |                                            |          |             |                           |                  |  |
| Visit to dentist in past month                           | 8.7                                        | 11.8                                              | 0.71 (0.55–0.92)                                                                                                                      | 0.69 (0.50–0.95)                           |          |             |                           |                  |  |
| Almirall 2013 [12]                                       | Single-centre, prospective                 | Patients $\geq 70$ yrs hospitalised with CAP n=36 | Randomly selected from independently-living older subjects assigned to the local primary care centre; matched 2:1 by sex and age n=72 | Barthel index <100                         | 69.4     | 25.0        | 6.82 (2.81–16.6)          | 6.93 (2.13–22.5) |  |
| Che 2008 [30]                                            | Multicentre, prospective, population-based | Patients with sporadic Legionnaires'              | Selected from the same general practices as cases; matched (1:1) by sex, age                                                          | >3 (men)/>2 (women) units alcohol/day      | NR       | NR          |                           | 1.83 (1.28–2.61) |  |
|                                                          |                                            |                                                   |                                                                                                                                       | Living in block of flats vs.               | NR       | NR          |                           | 2.54 (1.75–3.68) |  |



| Citation             | Study type                                           | Definition of cases                                                     | Definition of controls                                                                                                              | Risk factor(s)                                                                                                                                                             |                                                                           |                                                                           |                                                                                                                                                                                    |
|----------------------|------------------------------------------------------|-------------------------------------------------------------------------|-------------------------------------------------------------------------------------------------------------------------------------|----------------------------------------------------------------------------------------------------------------------------------------------------------------------------|---------------------------------------------------------------------------|---------------------------------------------------------------------------|------------------------------------------------------------------------------------------------------------------------------------------------------------------------------------|
|                      |                                                      |                                                                         |                                                                                                                                     | Factor                                                                                                                                                                     | Cases, %                                                                  | Controls, %                                                               | Odds ratio (95% CI)<br>Crude      Adjusted                                                                                                                                         |
|                      |                                                      | disease<br>n=546                                                        | (±10 yrs for cases <65 yrs; ±5 yrs for cases ≥65 yrs), underlying conditions and location of residence ≤5 km<br>n=546               | individual home<br>Travel within 10 days of infection:<br>Hotel<br>Other accommodation<br>Exclusive use of wash-hand basin for personal hygiene                            | NR<br>NR<br>NR                                                            | NR<br>NR                                                                  | 5.40 (3.16–9.22)<br>1.89 (1.28–2.78)<br>1.96 (1.21–3.17)                                                                                                                           |
| Müllerova 2012 [19]  | Multicentre, retrospective, population-based, nested | Patients ≥45 yrs with COPD and a diagnosis of CAP<br>n=1469             | Patients ≥45 yrs with COPD and no CAP; matched 1:5 on length of follow-up<br>n=7345                                                 | Smoking<br>Non-smoker<br>Former<br>Current<br><br>Body mass index, kg/m <sup>2</sup><br><18.5<br>18.5–24.9<br>25.0–29.9<br>≥30                                             | 20.4<br>35.8<br>36.7<br>NR<br>NR<br>NR<br>NR                              | 17.5<br>35.4<br>41.1<br>NR<br>NR<br>NR<br>NR                              | 1.0 (ref)<br>1.04 (0.90–1.2)<br>0.99 (0.86–1.14)<br><br>1.15 (0.92–1.43)<br>1.0 (ref)<br>0.78 (0.67–0.90)<br>0.71 (0.60–0.85)                                                      |
| Myles 2009 [22]      | Multicentre, retrospective, population-based, nested | Primary care patients ≥40 yrs with a diagnosis of pneumonia<br>n=3709   | Selected from same general practices as cases; matched 6:1 by practice, sex and age (±3 yrs)<br>n=22,174                            | Current smoker                                                                                                                                                             | 26.8                                                                      | 18.8                                                                      | 1.7 (1.6–1.8)                                                                                                                                                                      |
| Rodriguez 2009 [59]  | Multicentre, nested, prospectively collected data    | Primary care patients 20–79 yrs with a diagnosis of pneumonia<br>n=7297 | Randomly selected from study population; frequency-matched for sex, yr of age and index date<br>n=9993                              | Smoking<br>Non-smoker<br>Former<br>Current                                                                                                                                 | 25<br>25<br>43                                                            | 33<br>23<br>35                                                            | <b>Relative risk</b><br>1.00 (ref)<br>1.14 (1.04–1.25)<br>1.52 (1.40–1.65)                                                                                                         |
| Schlienger 2007 [21] | Multicentre, population-based, retrospective, nested | Primary care patients ≥30 yrs with a diagnosis of pneumonia<br>n=1253   | Randomly selected from study population; up to 4 per case, matched for sex, age (±2 yrs), general practice and index date<br>n=4838 | Smoking<br>Non-smoker<br>Former<br>Current<br>Alcohol abuse<br>Body mass index, kg/m <sup>2</sup><br><25<br>25–29.9<br>≥30<br>GP visits in past yr<br>1–4<br>5–14<br>15–29 | 47.1<br>18.4<br>22.0<br>2.5<br>32.8<br>29.1<br>13.7<br>19.0<br>1.1<br>8.9 | 57.3<br>16.7<br>15.8<br>1.5<br>29.7<br>37.4<br>15.4<br>41.8<br>1.3<br>7.1 | 1.00 (ref)<br>1.40 (1.17–1.68)<br>1.81 (1.53–2.15)<br>1.85 (1.19–2.88)<br>1.00 (ref)<br>0.70 (0.60–0.82)<br>0.81 (0.66–0.99)<br>1.00 (ref)<br>1.85 (1.01–3.39)<br>2.82 (2.18–3.66) |

| Citation                    | Study type                                   | Definition of cases                                                         | Definition of controls                                                                                                           | Risk factor(s)                     |          |             |                     |                  |
|-----------------------------|----------------------------------------------|-----------------------------------------------------------------------------|----------------------------------------------------------------------------------------------------------------------------------|------------------------------------|----------|-------------|---------------------|------------------|
|                             |                                              |                                                                             |                                                                                                                                  | Factor                             | Cases, % | Controls, % | Odds ratio (95% CI) |                  |
|                             |                                              |                                                                             |                                                                                                                                  |                                    |          |             | Crude               | Adjusted         |
| Schnoor 2007 [61]           | Multicentre, prospective, population-based   | Patients ≥18 yrs with a diagnosis of pneumonia n=1137                       | Randomly selected from local populations; frequency matched by sex and age (10-yr strata) n=1044                                 | Children in household              | 71.0     | 49.8        |                     |                  |
|                             |                                              |                                                                             |                                                                                                                                  | None                               | NR       | NR          | 1.00 (ref)          | 1.00 (ref)       |
|                             |                                              |                                                                             |                                                                                                                                  | 1                                  | NR       | NR          | 1.2 (0.9–1.6)       | 1.4 (1.0–2.0)    |
|                             |                                              |                                                                             |                                                                                                                                  | 2                                  | NR       | NR          | 2.1 (1.4–3.0)       | 2.2 (1.5–3.4)    |
|                             |                                              |                                                                             |                                                                                                                                  | ≥3                                 | NR       | NR          | 2.2 (1.1–4.2)       | 3.2 (1.5–7.0)    |
|                             |                                              |                                                                             |                                                                                                                                  | Body mass index                    |          |             |                     |                  |
|                             |                                              |                                                                             |                                                                                                                                  | Normal                             | NR       | NR          | 1.00 (ref)          | 1.00 (ref)       |
|                             |                                              |                                                                             |                                                                                                                                  | Underweight                        | NR       | NR          | 2.1 (1.3–3.4)       | 2.3 (1.3–3.9)    |
|                             |                                              |                                                                             |                                                                                                                                  | Overweight                         | NR       | NR          | 0.6 (0.5–0.7)       | 0.6 (0.5–0.7)    |
|                             |                                              |                                                                             |                                                                                                                                  | Obese                              | NR       | NR          | 0.8 (0.6–1.1)       | 0.7 (0.5–0.9)    |
|                             |                                              |                                                                             |                                                                                                                                  | School education                   |          |             |                     |                  |
|                             |                                              |                                                                             |                                                                                                                                  | ≤9 yrs                             | NR       | NR          | 1.00 (ref)          | 1.00 (ref)       |
|                             |                                              |                                                                             |                                                                                                                                  | 10 yrs                             | NR       | NR          | 0.6 (0.5–0.7)       | 0.6 (0.5–0.8)    |
| ≥12 yrs                     | NR                                           | NR                                                                          | 0.9 (0.7–1.1)                                                                                                                    | 0.8 (0.6–1.1)                      |          |             |                     |                  |
| Teepe 2010 [23]             | Multicentre, prospective, population-based   | Patients 16–40 yrs with a diagnosis of CAP n=156                            | Randomly selected from same primary care practices; matched 3:1 within same age group n=468                                      | Children in household              |          |             |                     |                  |
|                             |                                              |                                                                             |                                                                                                                                  | None                               | 23.1     | 33.2        | 1.00 (ref)          | 1.00 (ref)       |
|                             |                                              |                                                                             |                                                                                                                                  | 1                                  | 23.8     | 27.1        | 1.26 (0.73–2.18)    | 1.02 (0.54–1.91) |
|                             |                                              |                                                                             |                                                                                                                                  | 2                                  | 36.4     | 32.3        | 1.62 (0.98–2.68)    | 1.38 (0.77–2.46) |
|                             |                                              |                                                                             |                                                                                                                                  | ≥3                                 | 16.8     | 7.4         | 3.26 (1.67–6.38)    | 3.41 (1.57–7.41) |
|                             |                                              |                                                                             |                                                                                                                                  | Current smoking                    | 25.0     | 17.5        | 1.57 (1.00–2.46)    | 2.00 (1.20–3.36) |
|                             |                                              |                                                                             |                                                                                                                                  | Alcohol intake, g/day              |          |             |                     |                  |
|                             |                                              |                                                                             |                                                                                                                                  | 0                                  | 26.7     | 20.3        | 1.00 (ref)          |                  |
|                             |                                              |                                                                             |                                                                                                                                  | 0.1–20.9                           | 62.3     | 69.1        | 0.69 (0.44–1.07)    |                  |
|                             |                                              |                                                                             |                                                                                                                                  | 21.0–40.9                          | 5.5      | 7.9         | 0.53 (0.22–1.25)    |                  |
|                             |                                              |                                                                             |                                                                                                                                  | >41                                | 5.5      | 2.6         | 1.59 (0.59–4.25)    |                  |
|                             |                                              |                                                                             |                                                                                                                                  | Body mass index                    |          |             |                     |                  |
|                             |                                              |                                                                             |                                                                                                                                  | Normal                             | 55.9     | 53.3        | 1.00 (ref)          |                  |
|                             |                                              |                                                                             |                                                                                                                                  | Underweight                        | 3.3      | 3.8         | 1.04 (0.57–1.89)    |                  |
|                             |                                              |                                                                             |                                                                                                                                  | Overweight                         | 28.9     | 32.1        | 0.86 (0.57–1.31)    |                  |
| Obese                       | 11.8                                         | 10.8                                                                        | 1.04 (0.57–1.89)                                                                                                                 |                                    |          |             |                     |                  |
| Education level             |                                              |                                                                             |                                                                                                                                  |                                    |          |             |                     |                  |
| Low                         | 22.6                                         | 16.6                                                                        | 1.00 (ref)                                                                                                                       |                                    |          |             |                     |                  |
| Middle                      | 30.1                                         | 31.8                                                                        | 0.69 (0.41–1.19)                                                                                                                 |                                    |          |             |                     |                  |
| High                        | 47.3                                         | 51.6                                                                        | 0.67 (0.41–1.10)                                                                                                                 |                                    |          |             |                     |                  |
| Contact with any pets       | 36.9                                         | 40.8                                                                        | 0.85 (0.58–1.24)                                                                                                                 |                                    |          |             |                     |                  |
| Visit to dentist in past yr | 85.7                                         | 91.0                                                                        | 0.59 (0.34–1.04)                                                                                                                 |                                    |          |             |                     |                  |
| van de Garde 2006 [64]      | Multicentre, retrospective, population-based | Patients ≥18 yrs with diabetes mellitus and a first diagnosis of CAP n=4719 | Randomly selected from diabetic patients without a record of pneumonia; up to 4 per case, matched for general practice, sex, age | Current smoking                    | 12.7     | 9.2         | 1.48 (1.31–1.67)    |                  |
|                             |                                              |                                                                             |                                                                                                                                  | Alcoholism                         | 0.4      | 0.2         | 1.62 (0.91–2.91)    |                  |
|                             |                                              |                                                                             |                                                                                                                                  | Body mass index, kg/m <sup>2</sup> |          |             |                     |                  |
|                             |                                              |                                                                             |                                                                                                                                  | 20–24                              | 14.6     | 14.5        | 1.00 (ref)          |                  |
| <20                         | 5.3                                          | 3.0                                                                         | 1.73 (1.45–2.06)                                                                                                                 |                                    |          |             |                     |                  |

| Citation                  | Study type                                                         | Definition of cases                                              | Definition of controls                                                                                                                                           | Risk factor(s)               |          |             |                                            |
|---------------------------|--------------------------------------------------------------------|------------------------------------------------------------------|------------------------------------------------------------------------------------------------------------------------------------------------------------------|------------------------------|----------|-------------|--------------------------------------------|
|                           |                                                                    |                                                                  |                                                                                                                                                                  | Factor                       | Cases, % | Controls, % | Odds ratio (95% CI)<br>Crude      Adjusted |
|                           |                                                                    |                                                                  | (±2 yrs) and index date<br>n=15,322                                                                                                                              | 25–30                        | 22.9     | 32.2        | 0.71 (0.63–0.79)                           |
|                           |                                                                    |                                                                  |                                                                                                                                                                  | >30                          | 10.3     | 15.4        | 0.66 (0.58–0.75)                           |
| *Vinogradova<br>2009 [69] | Multicentre,<br>retrospective,<br>population-based,<br>nested      | Patients with a<br>diagnosis of<br>pneumonia<br>n=17,172         | Patients from same<br>database as cases without<br>pneumonia; matched 5:1<br>by practice, age (±1 yr),<br>sex and calendar time<br>n=71,399                      | Non-smoker                   | 69.9     | 73.3        | 1.00 (ref)                                 |
|                           |                                                                    |                                                                  |                                                                                                                                                                  | Current smoker               | 19.2     | 12.4        | 1.61 (1.53–1.69)                           |
|                           |                                                                    |                                                                  |                                                                                                                                                                  | Townsend deprivation score   |          |             |                                            |
|                           |                                                                    |                                                                  |                                                                                                                                                                  | 1st fifth (most<br>affluent) | 19.3     | 20.9        | 1.00 (ref)                                 |
|                           |                                                                    |                                                                  |                                                                                                                                                                  | 2nd fifth                    | 19.0     | 20.4        | 1.00 (0.95–1.06)                           |
|                           |                                                                    |                                                                  |                                                                                                                                                                  | 3rd fifth                    | 19.2     | 19.1        | 1.08 (1.02–1.15)                           |
|                           |                                                                    |                                                                  |                                                                                                                                                                  | 4th fifth                    | 18.8     | 17.4        | 1.18 (1.11–1.25)                           |
|                           |                                                                    |                                                                  |                                                                                                                                                                  | 5th fifth (most<br>deprived) | 20.7     | 18.4        | 1.27 (1.19–1.36)                           |
| Vinogradova<br>2011 [20]  | Multicentre,<br>retrospective,<br>population-care<br>based, nested | Patients ≥45 yrs<br>with a diagnosis of<br>pneumonia<br>n=17,755 | Randomly selected<br>patients from same<br>database as cases without<br>pneumonia; matched 5:1<br>by practice, age (±1 yr),<br>sex and calendar time<br>n=80,484 | Non-smoker                   | 61.2     | 64.9        | 1.00 (ref)                                 |
|                           |                                                                    |                                                                  |                                                                                                                                                                  | Current smoker               | 22.6     | 15.3        | 1.57 (1.50–1.64)                           |
|                           |                                                                    |                                                                  |                                                                                                                                                                  | Townsend deprivation score   |          |             |                                            |
|                           |                                                                    |                                                                  |                                                                                                                                                                  | 1st fifth (most<br>affluent) | 19.6     | 21.6        | 1.00 (ref)                                 |
|                           |                                                                    |                                                                  |                                                                                                                                                                  | 2nd fifth                    | 19.5     | 21.1        | 1.00 (0.95–1.06)                           |
|                           |                                                                    |                                                                  |                                                                                                                                                                  | 3rd fifth                    | 20.1     | 20.0        | 1.07 (1.01–1.13)                           |
|                           |                                                                    |                                                                  |                                                                                                                                                                  | 4th fifth                    | 18.9     | 17.4        | 1.13 (1.06–1.20)                           |
|                           |                                                                    |                                                                  |                                                                                                                                                                  | 5th fifth (most<br>deprived) | 19.5     | 16.9        | 1.21 (1.14–1.30)                           |

CI, confidence interval; COPD, chronic obstructive pulmonary disease; GP, general practitioner; NR, not reported; ref, reference; yr/yr, year/years.

<sup>a</sup> Sudden work temperature change when coming in or out of a refrigerator, furnace or kitchen; <sup>b</sup> Increase in odds ratio of 1.19 (95% CI 1.097–1.30) for each additional animal.

\* This study included patients of all ages (0→75 years); data were only presented for all age groups.

**Supplementary Table S4.** Risk factors identified in case–control studies investigating the association between comorbid conditions and the risk of community-acquired pneumonia (CAP).

| Citation              | Study type                                 | Definition of cases                                         | Definition of controls                                                                                                                | Risk factor(s)                     |          |             |                     |                  |                   |
|-----------------------|--------------------------------------------|-------------------------------------------------------------|---------------------------------------------------------------------------------------------------------------------------------------|------------------------------------|----------|-------------|---------------------|------------------|-------------------|
|                       |                                            |                                                             |                                                                                                                                       | Factor                             | Cases, % | Controls, % | Odds ratio (95% CI) |                  |                   |
|                       |                                            |                                                             |                                                                                                                                       |                                    |          |             | Crude               | Adjusted         |                   |
| Almirall 2008 [38]    | Multicentre, prospective, population-based | Primary care patients with CAP n=1336                       | Randomly selected from primary care centres; matched 1:1 by sex, age ( $\pm 5$ yrs) and primary care centre n=1326                    | Hospital admission in past 5 yrs   | 46.5     | 34.1        | 1.68 (1.44–1.96)    | 2.28 (1.81–2.89) |                   |
|                       |                                            |                                                             |                                                                                                                                       | Previous CAP:                      |          |             |                     |                  |                   |
|                       |                                            |                                                             |                                                                                                                                       | Any                                | 17.4     | 8.1         | 2.39 (1.88–3.05)    |                  |                   |
|                       |                                            |                                                             |                                                                                                                                       | >2 episodes                        | 1.3      | 0.2         | 6.25 (1.83–21.40)   |                  |                   |
|                       |                                            |                                                             |                                                                                                                                       | Upper respiratory tract infection: |          |             |                     |                  |                   |
|                       |                                            |                                                             |                                                                                                                                       | >1 in past yr                      | 44.4     | 33.7        | 1.57 (1.35–1.84)    |                  |                   |
|                       |                                            |                                                             |                                                                                                                                       | Any in past month                  | 31.8     | 13.8        | 2.91 (2.40–3.53)    |                  |                   |
|                       |                                            |                                                             |                                                                                                                                       | Bronchoscopy in past yr            | 2.0      | 1.0         | 2.09 (1.07–4.06)    |                  |                   |
|                       |                                            |                                                             |                                                                                                                                       | Nasogastric tube in past yr        | 1.2      | 0.4         | 3.21 (1.17–8.77)    |                  |                   |
|                       |                                            |                                                             |                                                                                                                                       | Diabetes mellitus                  | 10.1     | 7.2         | 1.43 (1.11–1.92)    |                  |                   |
|                       |                                            |                                                             |                                                                                                                                       | Heart failure                      | 8.6      | 4.9         | 1.81 (1.33–2.49)    |                  |                   |
|                       |                                            |                                                             |                                                                                                                                       | Heart valve disease                | 4.4      | 2.6         | 1.70 (1.11–2.61)    |                  |                   |
|                       |                                            |                                                             |                                                                                                                                       | Chronic bronchitis                 | 16.2     | 6.1         | 2.96 (2.26–3.87)    |                  |                   |
|                       |                                            |                                                             |                                                                                                                                       | Asthma                             | 28.1     | 14.3        | 2.33 (1.92–2.84)    |                  |                   |
|                       |                                            |                                                             |                                                                                                                                       | Non-active pulmonary tuberculosis  | 3.8      | 2.1         | 1.81 (1.13–2.89)    |                  |                   |
|                       |                                            |                                                             |                                                                                                                                       | Epilepsy                           | 1.3      | 0.5         | 2.83 (1.11–7.21)    |                  | 5.95 (1.62–21.74) |
|                       |                                            |                                                             |                                                                                                                                       | Dementia                           | 1.3      | 0.6         | 2.12 (0.91–4.94)    |                  |                   |
| Chronic liver disease | 2.9                                        | 1.7                                                         | 1.67 (0.99–2.82)                                                                                                                      |                                    |          |             |                     |                  |                   |
| Cancer                | 7.9                                        | 5.7                                                         | 1.42 (1.04–1.92)                                                                                                                      |                                    |          |             |                     |                  |                   |
| HIV                   | 1.1                                        | 0.2                                                         | 7.49 (1.71–32.81)                                                                                                                     |                                    |          |             |                     |                  |                   |
| Almirall 2013 [12]    | Single-centre, prospective,                | Patients $\geq 70$ yrs hospitalised with CAP n=36           | Randomly selected from independently-living older subjects assigned to the local primary care centre; matched 2:1 by sex and age n=72 | COPD/chronic bronchitis            | 50.0     | 27.8        | 2.60 (1.13–5.98)    | 3.80 (1.12–12.9) |                   |
|                       |                                            |                                                             |                                                                                                                                       | Chronic heart failure              | 44.4     | 21.1        | 2.99 (1.25–7.13)    |                  |                   |
|                       |                                            |                                                             |                                                                                                                                       | Oropharyngeal dysphagia            | 91.7     | 40.3        | 16.3 (4.57–58.2)    |                  |                   |
|                       |                                            |                                                             |                                                                                                                                       | Safety impairment                  | 61.1     | 25.0        | 4.71 (2.00–11.1)    |                  |                   |
|                       |                                            |                                                             |                                                                                                                                       | Efficacy impairment                | 83.3     | 33.3        | 10.0 (3.66–27.3)    |                  |                   |
| Hennessy 2007 [14]    | Retrospective, nested                      | Patients $\geq 65$ yrs hospitalised with pneumonia n=12,044 | Randomly selected from same GP practice as cases; matched 4:1 based on time in study n=48,176                                         | Any history of:                    |          |             |                     |                  |                   |
|                       |                                            |                                                             |                                                                                                                                       | Bipolar disorder                   | 0.3      | 0.2         | 2.50 (1.61–3.88)    |                  |                   |
|                       |                                            |                                                             |                                                                                                                                       | COPD                               | 20.2     | 6.2         | 3.92 (3.67–4.18)    |                  |                   |
|                       |                                            |                                                             |                                                                                                                                       | Cerebrovascular disease            | 17.4     | 8.0         | 2.04 (1.91–2.17)    |                  |                   |
|                       |                                            |                                                             |                                                                                                                                       | Depression                         | 20.2     | 14.0        | 1.75 (1.65–1.86)    |                  |                   |
|                       |                                            |                                                             |                                                                                                                                       | Dysphagia                          | 3.8      | 1.8         | 2.10 (1.85–2.38)    |                  |                   |
| Insomnia              | 22.5                                       | 14.7                                                        | 1.55 (1.46–1.63)                                                                                                                      |                                    |          |             |                     |                  |                   |

| Citation            | Study type                                           | Definition of cases                                              | Definition of controls                                                                                                 | Risk factor(s)              |          |             |                               |                   |
|---------------------|------------------------------------------------------|------------------------------------------------------------------|------------------------------------------------------------------------------------------------------------------------|-----------------------------|----------|-------------|-------------------------------|-------------------|
|                     |                                                      |                                                                  |                                                                                                                        | Factor                      | Cases, % | Controls, % | Odds ratio (95% CI)           |                   |
|                     |                                                      |                                                                  |                                                                                                                        |                             |          |             | Crude                         | Adjusted          |
|                     |                                                      |                                                                  |                                                                                                                        | Parkinson's disease         | 1.8      | 0.7         | 1.82 (1.52–2.19)              |                   |
|                     |                                                      |                                                                  |                                                                                                                        | Poor nutritional status     | 1.0      | 0.3         | 2.84 (2.18–3.70)              |                   |
|                     |                                                      |                                                                  |                                                                                                                        | Dementia                    | 4.5      | 1.3         | 2.24 (1.97–2.54)              |                   |
| Kornum 2008 [48]    | Multicentre, retrospective, population-based,        | Patients with discharge diagnoses (ICD-10) of pneumonia n=34,239 | Randomly selected from same registry as cases; matched 10:1 by age (yr of birth), sex and residence (county) n=342,390 |                             |          |             | <b>Relative risk (95% CI)</b> |                   |
|                     |                                                      |                                                                  |                                                                                                                        | Diabetes mellitus           |          |             |                               |                   |
|                     |                                                      |                                                                  |                                                                                                                        | Absent                      | 86.9     | 91.7        | 1.00 (ref)                    | 1.00 (ref)        |
|                     |                                                      |                                                                  |                                                                                                                        | Present                     | 13.1     | 8.3         | 1.68 (1.62–1.74)              | 1.26 (1.21–1.31)  |
|                     |                                                      |                                                                  |                                                                                                                        | Any diabetes                |          |             |                               |                   |
|                     |                                                      |                                                                  |                                                                                                                        | Age 15–39 yrs               | NR       | NR          | 3.93 (3.16–4.87)              | 3.21 (2.51–4.12)  |
|                     |                                                      |                                                                  |                                                                                                                        | Age 40–64 yrs               | NR       | NR          | 2.63 (2.43–2.84)              | 1.65 (1.51–1.81)  |
|                     |                                                      |                                                                  |                                                                                                                        | Age 65–79 yrs               | NR       | NR          | 1.64 (1.56–1.73)              | 1.22 (1.15–1.29)  |
|                     |                                                      |                                                                  |                                                                                                                        | Age ≥80 yrs                 | NR       | NR          | 1.33 (1.25–1.41)              | 1.11 (1.05–1.18)  |
|                     |                                                      |                                                                  |                                                                                                                        | Type 1 diabetes, overall    | 0.3      | 0.1         | 5.55 (4.34–7.08)              | 4.43 (3.40–5.77)  |
|                     |                                                      |                                                                  |                                                                                                                        | Age 15–39 yrs               | NR       | NR          | 6.41 (4.69–8.74)              | 5.15 (3.61–7.36)  |
|                     |                                                      |                                                                  |                                                                                                                        | Age 40–64 yrs               | NR       | NR          | 4.67 (3.12–6.98)              | 3.43 (2.14–5.50)  |
|                     |                                                      |                                                                  |                                                                                                                        | Comorbidity index           |          |             |                               |                   |
|                     |                                                      |                                                                  |                                                                                                                        | 0                           | NR       | NR          | 4.98 (3.67–6.74)              | 4.76 (3.43–6.61)  |
|                     |                                                      |                                                                  |                                                                                                                        | 1–2                         | NR       | NR          | 3.35 (0.88–12.78)             | 3.15 (0.80–12.38) |
|                     |                                                      |                                                                  |                                                                                                                        | Type 2 diabetes             | 12.8     | 8.3         | 1.65 (1.59–1.71)              | 1.23 (1.19–1.28)  |
|                     |                                                      |                                                                  |                                                                                                                        | Age 15–39 yrs               | NR       | NR          | 2.63 (1.94–3.58)              | 2.15 (1.51–3.06)  |
|                     |                                                      |                                                                  |                                                                                                                        | Age 40–64 yrs               | NR       | NR          | 2.58 (2.39–2.79)              | 1.62 (1.47–1.77)  |
|                     |                                                      |                                                                  |                                                                                                                        | Age 65–79 yrs               | NR       | NR          | 1.64 (1.56–1.73)              | 1.22 (1.15–1.29)  |
|                     |                                                      |                                                                  |                                                                                                                        | Comorbidity index           |          |             |                               |                   |
|                     |                                                      |                                                                  |                                                                                                                        | 0                           | NR       | NR          | 1.62 (1.52–1.73)              | 1.45 (1.36–1.55)  |
|                     |                                                      |                                                                  |                                                                                                                        | 1–2                         | NR       | NR          | 1.22 (1.15–1.29)              | 1.15 (1.07–1.22)  |
| Müllerova 2012 [19] | Multicentre, retrospective, population-based, nested | Patients ≥45 yrs with COPD and a diagnosis of CAP n=1469         | Patients ≥45 yrs with COPD and no CAP; matched 1:5 on length of follow-up n=7345                                       | Myocardial infarction       | 12.0     | 9.5         |                               | 1.00 (0.85–1.19)  |
|                     |                                                      |                                                                  |                                                                                                                        | Congestive heart failure    | 27.5     | 16.3        |                               | 1.37 (1.20–1.57)  |
|                     |                                                      |                                                                  |                                                                                                                        | Cerebrovascular disease     | 15.1     | 10.9        |                               | 1.08 (0.93–1.26)  |
|                     |                                                      |                                                                  |                                                                                                                        | Dementia                    | 3.6      | 1.0         |                               | 2.64 (1.86–3.75)  |
|                     |                                                      |                                                                  |                                                                                                                        | Peptic ulcer                | 18.4     | 14.6        |                               | 1.22 (1.06–1.41)  |
|                     |                                                      |                                                                  |                                                                                                                        | Peripheral vascular disease | 8.2      | 5.7         |                               | 1.27 (1.05–1.55)  |
|                     |                                                      |                                                                  |                                                                                                                        | Connective tissue disease   | 45.8     | 38.2        |                               | 1.16 (1.04–1.30)  |
|                     |                                                      |                                                                  |                                                                                                                        | Diabetes mellitus           | 10.4     | 8.5         |                               | 1.07 (0.89–1.28)  |
|                     |                                                      |                                                                  |                                                                                                                        | Anxiety                     | 25.7     | 21.4        |                               | 1.09 (0.95–1.25)  |
|                     |                                                      |                                                                  |                                                                                                                        | Depression                  | 29.2     | 24.4        |                               | 1.13 (0.99–1.28)  |
|                     |                                                      |                                                                  |                                                                                                                        | COPD exacerbation           |          |             |                               |                   |
|                     |                                                      |                                                                  |                                                                                                                        | Severe                      | 17.1     | 5.5         |                               | 2.73 (2.32–3.20)  |
|                     |                                                      |                                                                  |                                                                                                                        | Moderate                    | 14.0     | 7.9         |                               | 1.28 (1.13–1.46)  |
| Myles 2009 [22]     | Multicentre, retrospective, population-based,        | Primary care patients ≥40 yrs with a diagnosis of                | Selected from same general practices as cases; matched 6:1 by practice,                                                | Ischaemic heart disease     | 17.0     | 13.3        | 1.4 (1.2–1.5)                 |                   |
|                     |                                                      |                                                                  |                                                                                                                        | Chronic lung disease        | 24.7     | 10.4        | 2.9 (2.7–3.2)                 |                   |
|                     |                                                      |                                                                  |                                                                                                                        | Charlson comorbidity index  |          |             |                               |                   |

| Citation             | Study type                                           | Definition of cases                                                         | Definition of controls                                                                                                                    | Risk factor(s)                                   |          |             |                               |          |
|----------------------|------------------------------------------------------|-----------------------------------------------------------------------------|-------------------------------------------------------------------------------------------------------------------------------------------|--------------------------------------------------|----------|-------------|-------------------------------|----------|
|                      |                                                      |                                                                             |                                                                                                                                           | Factor                                           | Cases, % | Controls, % | Odds ratio (95% CI)           |          |
|                      |                                                      |                                                                             |                                                                                                                                           |                                                  |          |             | Crude                         | Adjusted |
|                      | nested                                               | pneumonia<br>n=3709                                                         | sex and age ( $\pm 3$ yrs)<br>n=22,174                                                                                                    | score                                            |          |             |                               |          |
|                      |                                                      |                                                                             |                                                                                                                                           | 0                                                | 29.1     | 50.9        | 1.0 (ref)                     |          |
|                      |                                                      |                                                                             |                                                                                                                                           | 1–2                                              | 43.7     | 35.2        | 2.5 (2.3–2.7)                 |          |
|                      |                                                      |                                                                             |                                                                                                                                           | 3–5                                              | 23.7     | 13.0        | 4.0 (3.6–4.4)                 |          |
|                      |                                                      |                                                                             |                                                                                                                                           | >5                                               | 3.5      | 1.0         | 7.9 (6.3–10.0)                |          |
|                      |                                                      |                                                                             |                                                                                                                                           | Previous pneumonia                               | 10.2     | 2.9         | 4.1 (3.6–4.8)                 |          |
| Rodriguez 2009 [42]  | Multicentre, nested, prospectively collected data    | Primary care patients 20–79 yrs with a diagnosis of pneumonia<br>n=7297     | Randomly selected from study population; frequency-matched for sex, yr of age and index date<br>n=9993                                    |                                                  |          |             | <b>Relative risk (95% CI)</b> |          |
|                      |                                                      |                                                                             |                                                                                                                                           | COPD                                             | 16       | 4           | 2.82 (2.45–3.24)              |          |
|                      |                                                      |                                                                             |                                                                                                                                           | Asthma                                           | 25       | 12          | 1.58 (1.44–1.74)              |          |
|                      |                                                      |                                                                             |                                                                                                                                           | Ischaemic heart disease                          | 17       | 11          | 1.28 (1.16–1.42)              |          |
|                      |                                                      |                                                                             |                                                                                                                                           | Myocardial infarction                            | 7        | 4           | 1.42 (1.22–1.65)              |          |
|                      |                                                      |                                                                             |                                                                                                                                           | Cerebrovascular disease                          | 9        | 6           | 1.42 (1.25–1.61)              |          |
|                      |                                                      |                                                                             |                                                                                                                                           | Heart failure                                    | 7        | 2           | 2.63 (2.21–3.14)              |          |
|                      |                                                      |                                                                             |                                                                                                                                           | Diabetes mellitus                                | 11       | 7           | 1.28 (1.13–1.44)              |          |
|                      |                                                      |                                                                             |                                                                                                                                           | Rheumatoid arthritis                             | 4        | 2           | 1.37 (1.12–1.69)              |          |
|                      |                                                      |                                                                             |                                                                                                                                           | Cancer                                           | 12       | 7           | 1.37 (1.22–1.54)              |          |
|                      |                                                      |                                                                             |                                                                                                                                           | Anaemia                                          | 9        | 6           | 1.43 (1.25–1.62)              |          |
|                      |                                                      |                                                                             |                                                                                                                                           | Depression                                       | 28       | 19          | 1.30 (1.19–1.40)              |          |
|                      |                                                      |                                                                             |                                                                                                                                           | Gastrointestinal disease                         |          |             |                               |          |
|                      |                                                      |                                                                             |                                                                                                                                           | GERD                                             | 15       | 11          | 1.07 (0.97–1.18)              |          |
|                      |                                                      |                                                                             |                                                                                                                                           | Dyspepsia                                        | 23       | 18          | 1.12 (1.03–1.22)              |          |
|                      |                                                      |                                                                             |                                                                                                                                           | Uncomplicated peptic ulcer                       | 6        | 3           | 1.49 (1.26–1.75)              |          |
|                      |                                                      |                                                                             |                                                                                                                                           | Complicated peptic ulcer                         | 4        | 2           | 1.82 (1.49–2.23)              |          |
|                      |                                                      |                                                                             |                                                                                                                                           | $\geq 1$ hospital admission in past yr           | 17       | 7           | 1.77 (1.59–1.97)              |          |
| Schlienger 2007 [21] | Multicentre, population-based, retrospective, nested | Primary care patients $\geq 30$ yrs with a diagnosis of pneumonia<br>n=1253 | Randomly selected from study population; up to 4 per case, matched for sex, age ( $\pm 2$ yrs), general practice and index date<br>n=4838 | Diabetes mellitus                                | 15.2     | 11.0        | 1.45 (1.21–1.73)              |          |
|                      |                                                      |                                                                             |                                                                                                                                           | Asthma or COPD                                   | 43.5     | 26.0        | 2.33 (2.03–2.67)              |          |
|                      |                                                      |                                                                             |                                                                                                                                           | Ischaemic heart disease or chronic heart failure | 18.8     | 10.7        | 2.28 (1.87–2.78)              |          |
|                      |                                                      |                                                                             |                                                                                                                                           | Stroke                                           | 16.7     | 8.7         | 2.10 (1.74–2.53)              |          |
|                      |                                                      |                                                                             |                                                                                                                                           | Venous thromboembolism or pulmonary embolism     | 2.6      | 1.7         | 1.55 (1.02–2.37)              |          |
|                      |                                                      |                                                                             |                                                                                                                                           | Rheumatoid arthritis                             | 8.7      | 6.3         | 1.46 (1.14–1.88)              |          |
|                      |                                                      |                                                                             |                                                                                                                                           | Depression or bipolar disorder                   | 13.9     | 8.9         | 1.77 (1.54–2.18)              |          |
|                      |                                                      |                                                                             |                                                                                                                                           | Epilepsy                                         | 3.0      | 1.1         | 2.81 (1.83–4.30)              |          |
| Schnoor 2007 [44]    | Multicentre, prospective, population-based           | Patients $\geq 18$ yrs with a diagnosis of pneumonia<br>n=1137              | Randomly selected from local populations; frequency matched by sex and age (10-yr strata)                                                 | Hospitalization in past 5 yrs                    | NR       | NR          | 1.6 (1.4–1.9)                 |          |
|                      |                                                      |                                                                             |                                                                                                                                           | >1 respiratory infection in past yr              | NR       | NR          | 4.5 (3.7–5.4)                 |          |
|                      |                                                      |                                                                             |                                                                                                                                           | Previous CAP                                     | NR       | NR          | 2.4 (2.0–2.9)                 |          |
|                      |                                                      |                                                                             |                                                                                                                                           |                                                  |          |             | 1.6 (1.3–2.1)                 |          |

| Citation                | Study type                                           | Definition of cases                                                            | Definition of controls                                                                                                                                               | Risk factor(s)                                   |          |             |                     |                  |
|-------------------------|------------------------------------------------------|--------------------------------------------------------------------------------|----------------------------------------------------------------------------------------------------------------------------------------------------------------------|--------------------------------------------------|----------|-------------|---------------------|------------------|
|                         |                                                      |                                                                                |                                                                                                                                                                      | Factor                                           | Cases, % | Controls, % | Odds ratio (95% CI) |                  |
|                         |                                                      |                                                                                |                                                                                                                                                                      |                                                  |          |             | Crude               | Adjusted         |
|                         |                                                      |                                                                                | n=1044                                                                                                                                                               | Chronic pulmonary disease                        | NR       | NR          | 3.9 (3.1–4.9)       | 2.3 (1.7–3.0)    |
|                         |                                                      |                                                                                |                                                                                                                                                                      | Chronic heart disease                            | NR       | NR          | 3.2 (2.6–4.1)       |                  |
|                         |                                                      |                                                                                |                                                                                                                                                                      | Chronic liver disease                            | NR       | NR          | 2.1 (1.2–4.0)       |                  |
|                         |                                                      |                                                                                |                                                                                                                                                                      | Chronic renal disease                            | NR       | NR          | 1.7 (1.1–2.8)       |                  |
| Teepe 2010 [23]         | Multicentre, prospective, population-based           | Patients 16–40 yrs with a diagnosis of CAP<br>n=156                            | Randomly selected from same primary care practices; matched 3:1 within same age group<br>n=468                                                                       | Asthma                                           | 12.2     | 5.8         | 2.27 (1.22–4.20)    | 2.69 (1.23–5.88) |
|                         |                                                      |                                                                                |                                                                                                                                                                      | Sinusitis                                        | 15.4     | 9.0         | 1.84 (1.08–3.16)    |                  |
|                         |                                                      |                                                                                |                                                                                                                                                                      | Upper respiratory tract infections in past 6 yrs |          |             |                     |                  |
|                         |                                                      |                                                                                |                                                                                                                                                                      | 0                                                | 75.0     | 83.8        | 1.00 (ref)          | 1.00 (ref)       |
|                         |                                                      |                                                                                |                                                                                                                                                                      | 1–2                                              | 21.2     | 14.7        | 1.60 (1.01–2.55)    | 1.49 (0.87–2.56) |
|                         |                                                      |                                                                                |                                                                                                                                                                      | >3                                               | 3.8      | 1.5         | 2.87 (0.95–8.71)    | 4.84 (1.24–18.9) |
|                         |                                                      |                                                                                |                                                                                                                                                                      | Depressive disorder                              | 5.8      | 2.4         | 2.54 (1.03–6.26)    |                  |
|                         |                                                      |                                                                                |                                                                                                                                                                      | GERD                                             | 3.2      | 1.1         | 3.07 (0.88–10.74)   |                  |
| †van de Garde 2006 [47] | Multicentre, retrospective, population-based         | Patients ≥18 yrs with diabetes mellitus and a first diagnosis of CAP<br>n=4719 | Randomly selected from diabetic patients without a record of pneumonia; up to 4 per case, matched for general practice, sex, age (±2 yrs) and index date<br>n=15,322 | Cardiovascular disease                           | 46.4     | 23.6        | 2.81 (2.62–3.00)    |                  |
|                         |                                                      |                                                                                |                                                                                                                                                                      | Pulmonary disease                                | 20.1     | 10.4        | 2.17 (1.99–2.37)    |                  |
| †van de Garde 2007[49]  | Multicentre, retrospective, population-based         | Patients ≥18 yrs with diabetes mellitus and a first diagnosis of CAP<br>n=4719 | Randomly selected from diabetic patients without a record of pneumonia; up to 4 per case, matched for general practice, sex, age (±2 yrs) and index date<br>n=15,322 | History of stroke                                | 25.1     | 12.4        | 2.37 (2.19–2.57)    |                  |
|                         |                                                      |                                                                                |                                                                                                                                                                      | Congestive heart failure                         | 30.1     | 14.1        | 2.63 (2.43–2.84)    |                  |
| *Vinogradova 2009 [46]  | Multicentre, retrospective, population-based, nested | Patients with a diagnosis of pneumonia<br>n=17,172                             | Patients from same database without pneumonia; matched 5:1 by practice, age (±1 yr), sex and calendar time<br>n=71,399                                               | Diabetes mellitus                                | 7.8      | 5.4         | 1.54 (1.44–1.65)    | 1.36 (1.27–1.47) |
|                         |                                                      |                                                                                |                                                                                                                                                                      | Chronic heart disease                            | 18.9     | 12.0        | 1.91 (1.81–2.00)    | 1.63 (1.54–1.72) |
|                         |                                                      |                                                                                |                                                                                                                                                                      | Ischaemic heart disease                          | 13.6     | 9.8         | 1.54 (1.46–1.63)    |                  |
|                         |                                                      |                                                                                |                                                                                                                                                                      | No ischaemic disease                             | 5.3      | 2.2         | 2.53 (2.31–2.76)    |                  |
|                         |                                                      |                                                                                |                                                                                                                                                                      | Chronic renal disease                            | 1.2      | 0.5         | 2.15 (1.81–2.56)    | 1.72 (1.43–2.07) |
|                         |                                                      |                                                                                |                                                                                                                                                                      | Chronic respiratory disease                      | 26.0     | 12.4        | 2.62 (2.51–2.73)    | 2.42 (2.31–2.53) |
|                         |                                                      |                                                                                |                                                                                                                                                                      | Treated asthma                                   | 13.6     | 5.7         | 2.65 (2.51–2.81)    |                  |
|                         |                                                      |                                                                                |                                                                                                                                                                      | Untreated asthma                                 | 2.9      | 2.4         | 1.19 (1.07–1.32)    |                  |
|                         |                                                      |                                                                                |                                                                                                                                                                      | Asplenia                                         | 0.3      | 0.1         | 2.88 (2.04–4.06)    | 2.58 (1.80–3.71) |
|                         |                                                      |                                                                                |                                                                                                                                                                      | Chronic liver disease                            | 0.5      | 0.2         | 2.24 (1.74–2.89)    | 1.87 (1.43–2.44) |
|                         |                                                      |                                                                                |                                                                                                                                                                      | Sickle cell or coeliac disease                   | 0.3      | 0.1         | 2.65 (1.87–3.75)    | 2.42 (1.68–3.49) |
|                         |                                                      |                                                                                |                                                                                                                                                                      | HIV/AIDS                                         | 0.1      | 0           | 2.71 (1.50–4.90)    | 2.48 (1.34–4.58) |
|                         |                                                      |                                                                                |                                                                                                                                                                      | Stroke or TIA                                    | 8.5      | 5.0         | 1.86 (1.74–1.99)    | 1.63 (1.52–1.75) |

| Citation              | Study type                                           | Definition of cases                                     | Definition of controls                                                                                                                | Risk factor(s)                 |          |             |                     |                   |
|-----------------------|------------------------------------------------------|---------------------------------------------------------|---------------------------------------------------------------------------------------------------------------------------------------|--------------------------------|----------|-------------|---------------------|-------------------|
|                       |                                                      |                                                         |                                                                                                                                       | Factor                         | Cases, % | Controls, % | Odds ratio (95% CI) |                   |
|                       |                                                      |                                                         |                                                                                                                                       |                                |          |             | Crude               | Adjusted          |
|                       |                                                      |                                                         |                                                                                                                                       | Rheumatoid arthritis           | 2.3      | 1.1         | 2.02 (1.79–2.29)    | 1.84 (1.62–2.10)  |
|                       |                                                      |                                                         |                                                                                                                                       | Parkinson's disease            | 1.3      | 0.7         | 1.87 (1.60–2.19)    | 1.82 (1.53–2.15)  |
|                       |                                                      |                                                         |                                                                                                                                       | Multiple sclerosis             | 0.5      | 0.2         | 3.20 (2.40–4.26)    | 3.63 (2.70–4.88)  |
|                       |                                                      |                                                         |                                                                                                                                       | Dementia                       | 2.2      | 0.9         | 2.41 (2.11–2.75)    | 2.45 (2.13–2.81)  |
|                       |                                                      |                                                         |                                                                                                                                       | Osteoporosis                   | 3.8      | 2.2         | 1.84 (1.67–2.03)    | 1.57 (1.41–1.74)  |
|                       |                                                      |                                                         |                                                                                                                                       | Any cancer                     | 6.7      | 4.2         | 1.70 (1.58–1.82)    | 1.42 (1.30–1.56)  |
|                       |                                                      |                                                         |                                                                                                                                       | Lung cancer                    | 0.6      | 0.1         | 4.73 (3.58–6.25)    |                   |
|                       |                                                      |                                                         |                                                                                                                                       | Immunosuppressed               | 4.5      | 4.1         | 1.12 (1.03–1.21)    | 1.40 (1.26–1.55)  |
| Vinogradova 2011 [20] | Multicentre, retrospective, population-based, nested | Patients ≥45 yrs with a diagnosis of pneumonia n=17,755 | Randomly selected patients from same database without pneumonia; matched 5:1 by practice, age (±1 yr), sex and calendar time n=80,484 | Diabetes mellitus              | 11.0     | 7.6         |                     | 1.33 (1.26–1.41)  |
|                       |                                                      |                                                         |                                                                                                                                       | Chronic heart disease          | 29.7     | 17.8        |                     | 1.66 (1.59–1.73)  |
|                       |                                                      |                                                         |                                                                                                                                       | Chronic renal disease          | 1.8      | 0.7         |                     | 1.78 (1.53–2.07)  |
|                       |                                                      |                                                         |                                                                                                                                       | Chronic respiratory disease    | 30.4     | 14.1        |                     | 2.47 (2.37–2.58)  |
|                       |                                                      |                                                         |                                                                                                                                       | Chronic liver disease          | 0.8      | 0.3         |                     | 1.85 (1.48–2.31)  |
|                       |                                                      |                                                         |                                                                                                                                       | Sickle cell or coeliac disease | 0.3      | 0.2         |                     | 1.72 (1.23–2.39)  |
|                       |                                                      |                                                         |                                                                                                                                       | HIV/AIDS                       | 0.1      | 0           |                     | 5.90 (2.55–13.64) |
|                       |                                                      |                                                         |                                                                                                                                       | Stroke or TIA                  | 13.5     | 7.6         |                     | 1.68 (1.58–1.77)  |
|                       |                                                      |                                                         |                                                                                                                                       | Rheumatoid arthritis           | 3.3      | 1.6         |                     | 1.83 (1.64–2.03)  |
|                       |                                                      |                                                         |                                                                                                                                       | Parkinson's disease            | 2.2      | 1.1         |                     | 1.98 (1.74–2.26)  |
|                       |                                                      |                                                         |                                                                                                                                       | Multiple sclerosis             | 0.7      | 0.2         |                     | 3.84 (3.02–4.89)  |
|                       |                                                      |                                                         |                                                                                                                                       | Dementia                       | 4.1      | 1.6         |                     | 2.68 (2.42–2.97)  |
|                       |                                                      |                                                         |                                                                                                                                       | Cancer                         | 9.7      | 6.0         |                     | 1.36 (1.24–1.49)  |

AIDS, autoimmunity deficiency syndrome; CI, confidence interval; COPD, chronic obstructive pulmonary disease; GERD, gastro-oesophageal reflux; GP, general practitioner; HIV, human immunodeficiency virus; ICD, International Classification of Diseases; ref, reference; NR, not reported; RR, relative risk; TIA, transient ischaemic attack; yr/yrs, year/years.

†Separate analyses in the same population; \*This study included patients of all ages (0–>75 years); data were presented only for all age groups.



**Supplementary Table S5.** Observational data for the rates of comorbid conditions in adults with community-acquired pneumonia (CAP). Data were available from both case-control and observational studies.

| Citation           | Population                                                                                     | Comorbid condition                              | Study cohorts<br>(data are % of patients) |                                 |                                       |
|--------------------|------------------------------------------------------------------------------------------------|-------------------------------------------------|-------------------------------------------|---------------------------------|---------------------------------------|
| Almirall 2010 [37] | Primary care patients with chronic bronchitis<br>n=122                                         | Upper respiratory tract infection in past month | 46.3                                      |                                 |                                       |
|                    |                                                                                                | Asthma                                          | 8.2                                       |                                 |                                       |
|                    |                                                                                                | Previous CAP                                    | 23.8                                      |                                 |                                       |
|                    |                                                                                                | Other respiratory disease                       | 4.2                                       |                                 |                                       |
|                    |                                                                                                | Diabetes mellitus                               | 22.1                                      |                                 |                                       |
|                    |                                                                                                | Heart failure                                   | 18.3                                      |                                 |                                       |
|                    |                                                                                                | Depression                                      | 21.3                                      |                                 |                                       |
|                    |                                                                                                | Cancer                                          | 9.8                                       |                                 |                                       |
|                    | Primary care patients with COPD<br>n=94                                                        | Upper respiratory tract infection in past month | 46.8                                      |                                 |                                       |
|                    |                                                                                                | Asthma                                          | 50.0                                      |                                 |                                       |
|                    |                                                                                                | Previous CAP                                    | 29.8                                      |                                 |                                       |
|                    |                                                                                                | Diabetes mellitus                               | 29.8                                      |                                 |                                       |
|                    |                                                                                                | Heart failure                                   | 17.0                                      |                                 |                                       |
|                    |                                                                                                | Depression                                      | 13.8                                      |                                 |                                       |
|                    | Primary care patients with asthma<br>n=256                                                     | Upper respiratory tract infection in past month | 61.3                                      |                                 |                                       |
| Previous CAP       |                                                                                                | 21.5                                            |                                           |                                 |                                       |
| Diabetes mellitus  |                                                                                                | 12.9                                            |                                           |                                 |                                       |
| Heart failure      |                                                                                                | 9.8                                             |                                           |                                 |                                       |
| Depression         |                                                                                                | 14.5                                            |                                           |                                 |                                       |
| Cancer             |                                                                                                | 6.3                                             |                                           |                                 |                                       |
| Bewick 2012 [38]   | Patients ≥16 yrs hospitalised with CAP                                                         |                                                 | <b>All patients (n=920)</b>               | <b>Pneumococcal CAP (n=366)</b> |                                       |
|                    |                                                                                                | COPD                                            | 26.5                                      | 25.7                            |                                       |
|                    |                                                                                                | Ischaemic heart disease                         | 15.8                                      | 16.7                            |                                       |
|                    |                                                                                                | Diabetes mellitus                               | 14.1                                      | 14.8                            |                                       |
|                    |                                                                                                | Cerebrovascular disease                         | 11.2                                      | 12.3                            |                                       |
|                    |                                                                                                | Asthma                                          | 11.1                                      | 12.8                            |                                       |
|                    |                                                                                                | Congestive heart failure                        | 8.0                                       | 7.1                             |                                       |
|                    |                                                                                                | Active malignancy                               | 7.3                                       | 10.4                            |                                       |
|                    |                                                                                                | Dementia                                        | 3.5                                       | 5.7                             |                                       |
| Cabre 2010 [13]    | Patients ≥70 yrs with CAP requiring hospitalisation<br>[**p≤0.01; ***p≤0.001 vs. safe swallow] |                                                 | <b>All patients (n=134)</b>               | <b>Safe swallow (n=60)</b>      | <b>Oropharyngeal dysphagia (n=74)</b> |
|                    |                                                                                                | Oropharyngeal dysphagia                         | 55.2                                      |                                 |                                       |
|                    |                                                                                                | Chronic pneumopathy                             | 53.7                                      | 55.0                            | 52.7                                  |

| Citation            | Population                                                                                              | Comorbid condition                | Study cohorts<br>(data are % of patients) |                                |                                  |
|---------------------|---------------------------------------------------------------------------------------------------------|-----------------------------------|-------------------------------------------|--------------------------------|----------------------------------|
|                     |                                                                                                         |                                   |                                           |                                |                                  |
|                     |                                                                                                         | Heart failure                     | 23.9                                      | 18.3                           | 28.4                             |
|                     |                                                                                                         | Ischaemic heart disease           | 14.9                                      | 13.3                           | 16.2                             |
|                     |                                                                                                         | Diabetes mellitus                 | 30.6                                      | 28.3                           | 32.4                             |
|                     |                                                                                                         | Chronic liver disease             | 3.0                                       | 3.3                            | 2.7                              |
|                     |                                                                                                         | Cancer                            | 12.7                                      | 11.7                           | 13.5                             |
|                     |                                                                                                         | Dementia                          | 33.6                                      | 13.3                           | 50.0***                          |
|                     |                                                                                                         | Cerebrovascular disease           | 24.6                                      | 13.3                           | 33.8**                           |
|                     |                                                                                                         | Chronic renal failure             | 26.7                                      | 26.7                           | 26.8                             |
| Carratalà 2007 [39] | Adult patients with CAP requiring hospitalisation<br>n=601                                              | COPD                              | 25.1                                      |                                |                                  |
|                     |                                                                                                         | Chronic heart disease             | 26.8                                      |                                |                                  |
|                     |                                                                                                         | Diabetes mellitus                 | 16.6                                      |                                |                                  |
|                     |                                                                                                         | Cerebrovascular disease           | 11.8                                      |                                |                                  |
|                     |                                                                                                         | Cancer                            | 4.7                                       |                                |                                  |
|                     |                                                                                                         | Chronic renal failure             | 3.3                                       |                                |                                  |
|                     |                                                                                                         | Chronic liver disease             | 3.7                                       |                                |                                  |
|                     |                                                                                                         | Autoimmune disease                | 1.3                                       |                                |                                  |
| Chidiac 2012 [31]   | Patients hospitalised with community-acquired Legionnaires' disease<br>n=540                            | Diabetes mellitus                 | 15.7                                      |                                |                                  |
|                     |                                                                                                         | Cancer                            | 6.3                                       |                                |                                  |
| Cillóniz 2011 [40]  | Patients with CAP admitted to ICU<br>n=362                                                              | Chronic respiratory disease       | 37                                        |                                |                                  |
|                     |                                                                                                         | COPD                              | 16                                        |                                |                                  |
|                     |                                                                                                         | Asthma                            | 6                                         |                                |                                  |
|                     |                                                                                                         | Bronchiectasis                    | 3                                         |                                |                                  |
|                     |                                                                                                         | Chronic cardiovascular disease    | 14                                        |                                |                                  |
|                     |                                                                                                         | Diabetes mellitus                 | 20                                        |                                |                                  |
|                     |                                                                                                         | Neurological disease              | 19                                        |                                |                                  |
|                     |                                                                                                         | Chronic renal disease             | 6                                         |                                |                                  |
|                     |                                                                                                         | Chronic liver disease             | 6                                         |                                |                                  |
| Cillóniz 2012 [41]  | Adult patients hospitalised with pneumococcal pneumonia<br>[**p≤0.01; ***p≤0.001 vs. uncomplicated CAP] |                                   | <b>All patients (n=626)</b>               | <b>Complicated CAP (n=235)</b> | <b>Uncomplicated CAP (n=391)</b> |
|                     |                                                                                                         | Chronic respiratory disease       | 44.2                                      | NR                             | NR                               |
|                     |                                                                                                         | COPD                              | 21.0                                      | 12.0***                        | 26.2                             |
|                     |                                                                                                         | Asthma                            | 6.6                                       | 8.2                            | 5.7                              |
|                     |                                                                                                         | Bronchiectasis                    | 10.3                                      | 11.2                           | 9.8                              |
|                     |                                                                                                         | Other chronic respiratory disease | 6.4                                       | 7.2                            | 5.2                              |
|                     |                                                                                                         | Chronic cardiovascular disease    | 13.5                                      | 10.7                           | 15.1                             |
|                     |                                                                                                         | Diabetes mellitus                 | 16.9                                      | 14.7                           | 18.3                             |
|                     |                                                                                                         | Neurological disease              | 14.0                                      | 14.1                           | 14.0                             |
|                     |                                                                                                         | Chronic renal disease             | 5.0                                       | 3.9                            | 5.7                              |
|                     |                                                                                                         | Chronic liver disease             | 6.1                                       | 9.4**                          | 4.1                              |

| Citation               | Population                                                                                                                                                                                                     | Comorbid condition                 | Study cohorts<br>(data are % of patients) |                                             |                                            |
|------------------------|----------------------------------------------------------------------------------------------------------------------------------------------------------------------------------------------------------------|------------------------------------|-------------------------------------------|---------------------------------------------|--------------------------------------------|
|                        |                                                                                                                                                                                                                |                                    | No abuse<br>(n=1165)                      | Current abuse<br>(n=128)                    | Former abuse<br>(n=54)                     |
|                        |                                                                                                                                                                                                                | Alcohol abuse                      | 16.8                                      | 20.2                                        | 14.8                                       |
| de Roux 2006 [10]      | Patients hospitalised with CAP (current alcohol abuse = daily consumption >80 g for men and 60 g for women during the past 2 yrs; former alcohol abuse = no abuse in past 1 yr) [*p<0.05 vs. no alcohol abuse] | COPD                               | 32                                        | 42*                                         | 52*                                        |
|                        |                                                                                                                                                                                                                | Chronic renal failure              | 8                                         | 2*                                          | 18*                                        |
|                        |                                                                                                                                                                                                                | Neurological disease               | 17                                        | 9*                                          | 22                                         |
|                        |                                                                                                                                                                                                                | Hepatic disease                    | 3                                         | 20*                                         | 15*                                        |
|                        |                                                                                                                                                                                                                | Neoplasm                           | 9                                         | 9                                           | 22*                                        |
| Ewig 2009 [42]         | Patients hospitalised with CAP n=388,406                                                                                                                                                                       | Cardiac disease                    | 19.2                                      |                                             |                                            |
|                        |                                                                                                                                                                                                                | CNS disorders                      | 13.8                                      |                                             |                                            |
|                        |                                                                                                                                                                                                                | Pulmonary disease (excluding COPD) | 13.1                                      |                                             |                                            |
|                        |                                                                                                                                                                                                                | Diabetes mellitus                  | 11.9                                      |                                             |                                            |
|                        |                                                                                                                                                                                                                | COPD                               | 9.4                                       |                                             |                                            |
|                        |                                                                                                                                                                                                                | Renal disease                      | 8.6                                       |                                             |                                            |
|                        |                                                                                                                                                                                                                | Dementia                           | 6.0                                       |                                             |                                            |
|                        |                                                                                                                                                                                                                | Malignancy (excluding bronchial)   | 3.3                                       |                                             |                                            |
|                        |                                                                                                                                                                                                                | Lung cancer                        | 1.6                                       |                                             |                                            |
|                        |                                                                                                                                                                                                                | Liver disease                      | 1.5                                       |                                             |                                            |
| Falguera 2009 [43]     | Patients hospitalised with CAP [**p≤0.01; ***p≤0.001 vs. no Gram-negative infections]                                                                                                                          |                                    | <b>All patients<br/>(n=3272)</b>          | <b>Gram-negative infection<br/>(n=61)</b>   | <b>No Gram-negative infection (n=3211)</b> |
|                        |                                                                                                                                                                                                                | ≥1 comorbid condition              | 61                                        | 79**                                        | 61                                         |
|                        |                                                                                                                                                                                                                | COPD                               | 26                                        | 46***                                       | 25                                         |
|                        |                                                                                                                                                                                                                | Congestive heart disease           | 22                                        | 21                                          | 22                                         |
|                        |                                                                                                                                                                                                                | Diabetes mellitus                  | 18                                        | 16                                          | 18                                         |
|                        |                                                                                                                                                                                                                | Chronic renal disease              |                                           | 3                                           | 4                                          |
|                        |                                                                                                                                                                                                                | Chronic liver disease              |                                           | 5                                           | 5                                          |
|                        |                                                                                                                                                                                                                | Cerebrovascular disease            |                                           | 0                                           | 4                                          |
|                        |                                                                                                                                                                                                                | Active neoplasm                    |                                           | 8                                           | 8                                          |
| Garcia-Vidal 2009 [44] | Patients hospitalised with CAP [***p≤0.001 vs. non-recurrent CAP]                                                                                                                                              |                                    | <b>Recurrent pneumonia<br/>(n=146)</b>    | <b>Non-recurrent pneumonia<br/>(n=1410)</b> |                                            |
|                        |                                                                                                                                                                                                                | Any comorbid condition             | 91.8***                                   | 71.5                                        |                                            |
|                        |                                                                                                                                                                                                                | COPD                               | 38.4***                                   | 25.1                                        |                                            |
|                        |                                                                                                                                                                                                                | Diabetes mellitus                  | 17.8                                      | 16.9                                        |                                            |
|                        |                                                                                                                                                                                                                | Cancer                             | 11.6                                      | 7.6                                         |                                            |
|                        |                                                                                                                                                                                                                | Cerebrovascular disease            | 4.8                                       | 3.2                                         |                                            |
|                        |                                                                                                                                                                                                                | Chronic heart disease              | 29.5                                      | 23.0                                        |                                            |
|                        |                                                                                                                                                                                                                | Chronic renal disease              | 3.4                                       | 3.2                                         |                                            |
|                        |                                                                                                                                                                                                                | Chronic liver disease              | 6.2                                       | 5.2                                         |                                            |
|                        |                                                                                                                                                                                                                | Dementia                           | 6.2                                       | 3.6                                         |                                            |

| Citation            | Population                                                                | Comorbid condition                    | Study cohorts<br>(data are % of patients) |                                       |
|---------------------|---------------------------------------------------------------------------|---------------------------------------|-------------------------------------------|---------------------------------------|
| Giannella 2012 [45] | Patients ≥16 yrs treated for CAP in internal medicine department<br>n=591 | COPD                                  | 37.4                                      |                                       |
|                     |                                                                           | Congestive heart failure              | 21.3                                      |                                       |
|                     |                                                                           | Diabetes mellitus                     | 25.2                                      |                                       |
|                     |                                                                           | Cerebrovascular disease               | 17.9                                      |                                       |
|                     |                                                                           | Dementia                              | 16.6                                      |                                       |
|                     |                                                                           | Cancer                                | 13.0                                      |                                       |
|                     |                                                                           | Chronic renal failure                 | 13.2                                      |                                       |
|                     |                                                                           | Chronic liver failure                 | 8.3                                       |                                       |
|                     |                                                                           | Autoimmune disease                    | 3.6                                       |                                       |
|                     |                                                                           | HIV                                   | 3.7                                       |                                       |
| Gulmez 2007 [46]    | Patients with a discharge diagnosis of CAP<br>n=7642                      | History of:                           |                                           |                                       |
|                     |                                                                           | CAP                                   | 15.5                                      |                                       |
|                     |                                                                           | COPD                                  | 18.8                                      |                                       |
|                     |                                                                           | Peptic ulcer                          | 7.2                                       |                                       |
|                     |                                                                           | Diabetes mellitus                     | 7.9                                       |                                       |
|                     |                                                                           | Renal failure                         | 1.9                                       |                                       |
|                     |                                                                           | Hepatic cirrhosis                     | 0.75                                      |                                       |
|                     |                                                                           | Ischaemic heart disease               | 15.4                                      |                                       |
|                     |                                                                           | Heart failure                         | 14.4                                      |                                       |
|                     |                                                                           | Stroke                                | 11.0                                      |                                       |
|                     |                                                                           | Alcohol-related diagnosis or drug use | 4.1                                       |                                       |
|                     |                                                                           | Psychiatric disorder                  | 7.2                                       |                                       |
| Gutierrez 2005 [47] | Patients ≥15 yrs with CAP<br>n=493                                        | Any comorbid condition                | 46                                        |                                       |
|                     |                                                                           | COPD                                  | 20.1                                      |                                       |
|                     |                                                                           | Diabetes mellitus                     | 19.9                                      |                                       |
|                     |                                                                           | Dementia                              | 10.5                                      |                                       |
|                     |                                                                           | Immunosuppression                     | 5.3                                       |                                       |
|                     |                                                                           | Neoplasia                             | 4.3                                       |                                       |
|                     |                                                                           | Congestive heart failure              | 4.1                                       |                                       |
|                     |                                                                           | Chronic renal failure                 | 3.4                                       |                                       |
| Holm 2007 [49]      | Primary care patients ≥18 yrs with a diagnosis of community-acquired LRTI |                                       | <b>All patients<br/>(n=364)</b>           | <b>Confirmed pneumonia<br/>(n=48)</b> |
|                     |                                                                           | COPD                                  | 9                                         | 21                                    |
|                     |                                                                           | Cardiac disease                       | 9                                         | 10                                    |
| Klapdor 2012 [50]   | Patients ≥18 yrs with CAP<br>[***p≤0.001 vs. patients <65 yrs]            |                                       | <b>Age &lt;65 yrs<br/>(n=4083)</b>        | <b>Age ≥65 yrs<br/>(n=3720)</b>       |
|                     |                                                                           | Any comorbidity                       | 46.6                                      | 88.2***                               |
|                     |                                                                           | Chronic respiratory disease           | 28.6                                      | 44.0***                               |
|                     |                                                                           | Congestive heart failure              | 5.9                                       | 34.4***                               |
|                     |                                                                           | Other heart disease                   | 12.6                                      | 49.7***                               |
|                     |                                                                           | Cerebrovascular disease               | 3.9                                       | 20.8***                               |

| Citation             | Population                                                                                 | Comorbid condition                  | Study cohorts<br>(data are % of patients) |                                 |
|----------------------|--------------------------------------------------------------------------------------------|-------------------------------------|-------------------------------------------|---------------------------------|
|                      |                                                                                            | Other chronic neurological disorder | 5.0                                       | 10.0***                         |
|                      |                                                                                            | Renal insufficiency                 | 2.9                                       | 15.2***                         |
|                      |                                                                                            | Chronic liver disease               | 3.7                                       | 2.9                             |
|                      |                                                                                            | Diabetes mellitus                   | 8.1                                       | 26.7***                         |
|                      |                                                                                            | Cancer                              | 5.4                                       | 13.9***                         |
| Kofteridis 2009 [34] | Adults hospitalised with community-acquired LRTI due to <i>Haemophilus influenzae</i> n=45 | Patients with ≥1 comorbid condition | 100                                       |                                 |
|                      |                                                                                            | COPD                                | 62                                        |                                 |
|                      |                                                                                            | Bronchiectasis                      | 18                                        |                                 |
|                      |                                                                                            | Solid tumour                        | 9                                         |                                 |
|                      |                                                                                            | Haematological malignancy           | 7                                         |                                 |
|                      |                                                                                            | Cardiovascular disease              | 36                                        |                                 |
|                      |                                                                                            | Ischaemic heart disease             | 27                                        |                                 |
|                      |                                                                                            | Cerebrovascular disease             | 7                                         |                                 |
|                      |                                                                                            | Peripheral vascular disease         | 2                                         |                                 |
|                      |                                                                                            | Chronic renal disease               | 2                                         |                                 |
|                      |                                                                                            | Diabetes mellitus                   | 29                                        |                                 |
|                      |                                                                                            | Chronic liver disease               | 7                                         |                                 |
|                      |                                                                                            | Alcoholism                          | 36                                        |                                 |
| Kothe 2008 [52]      | Patients with CAP [***p≤0.001 vs. patients <65 yrs]                                        |                                     | <b>Age &lt;65 yrs<br/>(n=1298)</b>        | <b>Age ≥65 yrs<br/>(n=1349)</b> |
|                      |                                                                                            | Chronic pulmonary disease           | 30.0                                      | 42.6***                         |
|                      |                                                                                            | Chronic heart disease               | 12.8                                      | 47.2***                         |
|                      |                                                                                            | Congestive heart failure            | 6.4                                       | 37.9***                         |
|                      |                                                                                            | Chronic liver disease               | 3.9                                       | 3.3                             |
|                      |                                                                                            | Chronic renal failure               | 2.9                                       | 13.3***                         |
|                      |                                                                                            | Cerebrovascular disease             | 4.1                                       | 22.3***                         |
|                      |                                                                                            | Other neurological disorder         | 6.6                                       | 10.1***                         |
|                      |                                                                                            | Diabetes mellitus                   | 8.3                                       | 28.1***                         |
| Liapikou 2012 [53]   | Adults hospitalised with CAP [**p≤0.01 vs. patients without COPD]                          |                                     | <b>No COPD<br/>(n=1167)</b>               | <b>With COPD<br/>(n=212)</b>    |
|                      |                                                                                            | Heart failure                       | 23.0                                      | 26.4                            |
|                      |                                                                                            | Chronic liver disease               | 4.1                                       | 5.7                             |
|                      |                                                                                            | Malignancy                          | 5.7                                       | 13.2**                          |
|                      |                                                                                            | Renal failure                       | 6.7                                       | 9.0                             |
|                      |                                                                                            | Neurological disease                | 27.2                                      | 21.7                            |
|                      |                                                                                            | Diabetes mellitus                   | 20.2                                      | 25.9                            |
|                      |                                                                                            | Pneumonia in previous yr            | 17.5                                      | 33.8**                          |
| Madeddu 2008 [27]    | HIV patients hospitalised with CAP n=76; 84 episodes                                       | Chronic hepatitis                   |                                           |                                 |
|                      |                                                                                            | HBV                                 | 7.9                                       |                                 |
|                      |                                                                                            | HCV                                 | 77.6                                      |                                 |
| Manno 2009 [28]      | HIV patients hospitalised with                                                             |                                     | <b>No cirrhosis</b>                       | <b>With cirrhosis</b>           |

| Citation             | Population                                                                                                  | Comorbid condition                                                                                | Study cohorts<br>(data are % of patients) |                              |
|----------------------|-------------------------------------------------------------------------------------------------------------|---------------------------------------------------------------------------------------------------|-------------------------------------------|------------------------------|
|                      | CAP [***p≤0.001 vs. no cirrhosis]                                                                           |                                                                                                   | <b>(n=73)</b>                             | <b>(n=29)</b>                |
|                      |                                                                                                             | Other comorbidities (diabetes mellitus, cancer, heart, renal, neurological and pulmonary disease) | 8.2                                       | 17.2                         |
|                      |                                                                                                             | Alcohol abuse                                                                                     | 6.9                                       | 55.6***                      |
|                      |                                                                                                             | Intravenous drug use                                                                              | 34.6                                      | 53.6                         |
|                      |                                                                                                             | Pneumonia within past month                                                                       | 9.6                                       | 17.2                         |
|                      |                                                                                                             | AIDS                                                                                              | 31.5                                      | 41.4                         |
| Migliorati 2006 [54] | Patients ≥15 yrs hospitalised with a discharge diagnosis of pneumonia or pneumonia-related disease<br>n=148 | ≥1 previous episode of pneumonia                                                                  | 14                                        |                              |
|                      |                                                                                                             | ≥1 comorbidity                                                                                    | 87                                        |                              |
|                      |                                                                                                             | COPD                                                                                              | 34                                        |                              |
|                      |                                                                                                             | Asthma                                                                                            | 3                                         |                              |
|                      |                                                                                                             | Other respiratory disease                                                                         | 5                                         |                              |
|                      |                                                                                                             | Liver disease                                                                                     | 15                                        |                              |
|                      |                                                                                                             | Congestive heart failure                                                                          | 24                                        |                              |
|                      |                                                                                                             | Cardiac arrhythmia                                                                                | 3                                         |                              |
|                      |                                                                                                             | Cancer                                                                                            | 10                                        |                              |
|                      |                                                                                                             | Obesity                                                                                           | 13                                        |                              |
|                      |                                                                                                             | Renal failure                                                                                     | 9                                         |                              |
|                      |                                                                                                             | Neuromuscular disease                                                                             | 5                                         |                              |
|                      |                                                                                                             | Alcohol abuse                                                                                     | 14                                        |                              |
|                      |                                                                                                             | Dementia or other cerebrovascular disease                                                         | 26                                        |                              |
|                      |                                                                                                             | Arterial hypertension                                                                             | 39                                        |                              |
|                      |                                                                                                             | Diabetes mellitus                                                                                 | 27                                        |                              |
|                      |                                                                                                             | Malnutrition                                                                                      | 9                                         |                              |
| Molinos 2009 [55]    | Patients hospitalised with CAP<br>[*p<0.05 vs. no cirrhosis]                                                |                                                                                                   | <b>No COPD<br/>(n=466)</b>                | <b>With COPD<br/>(n=244)</b> |
|                      |                                                                                                             | Cardiac disease                                                                                   | 18                                        | 23                           |
|                      |                                                                                                             | Renal disease                                                                                     | 6                                         | 9                            |
|                      |                                                                                                             | Hepatic disease                                                                                   | 4                                         | 4                            |
|                      |                                                                                                             | Cerebrovascular disease                                                                           | 9                                         | 8                            |
|                      |                                                                                                             | Diabetes mellitus                                                                                 | 14                                        | 20*                          |
|                      |                                                                                                             | Alcohol abuse                                                                                     | 11                                        | 18*                          |
| Müllerova 2012 [19]  | Patients ≥45 yrs with COPD<br>n=1469                                                                        | Asthma                                                                                            | 45.4                                      |                              |
|                      |                                                                                                             | Myocardial infarction                                                                             | 12.0                                      |                              |
|                      |                                                                                                             | Congestive heart failure                                                                          | 27.5                                      |                              |
|                      |                                                                                                             | Cerebrovascular disease                                                                           | 15.1                                      |                              |

| Citation          | Population                                                                              | Comorbid condition               | Study cohorts<br>(data are % of patients) |                                    |
|-------------------|-----------------------------------------------------------------------------------------|----------------------------------|-------------------------------------------|------------------------------------|
|                   |                                                                                         | Dementia                         | 3.6                                       |                                    |
|                   |                                                                                         | Peptic ulcer                     | 18.4                                      |                                    |
|                   |                                                                                         | Peripheral vascular disease      | 8.2                                       |                                    |
|                   |                                                                                         | Connective tissue disorder       | 45.8                                      |                                    |
|                   |                                                                                         | Diabetes mellitus                | 10.4                                      |                                    |
|                   |                                                                                         | Anxiety                          | 25.7                                      |                                    |
|                   |                                                                                         | Depression                       | 29.2                                      |                                    |
|                   |                                                                                         | Lung cancer                      | 2.0                                       |                                    |
|                   |                                                                                         | Renal disease                    | 4.1                                       |                                    |
| Myint 2011 [56]   | Patients hospitalised with acute exacerbations of COPD<br>[***p≤0.001 vs. no pneumonia] |                                  | <b>No pneumonia<br/>(n=7833)</b>          | <b>With pneumonia<br/>(n=1505)</b> |
|                   |                                                                                         | Number of comorbidities          |                                           |                                    |
|                   |                                                                                         | 0                                | 24                                        | 19                                 |
|                   |                                                                                         | 1                                | 32                                        | 32                                 |
|                   |                                                                                         | 2                                | 25                                        | 27                                 |
|                   |                                                                                         | ≥3                               | 19                                        | 23***                              |
| Nielsen 2012 [57] | Patients ≥15 yrs hospitalised with CAP<br>n=70,914                                      | Previous myocardial infarction   | 9.5                                       |                                    |
|                   |                                                                                         | Congestive heart failure         | 10.5                                      |                                    |
|                   |                                                                                         | Peripheral vascular disease      | 8.6                                       |                                    |
|                   |                                                                                         | Cerebrovascular disease          | 15.0                                      |                                    |
|                   |                                                                                         | Dementia                         | 2.2                                       |                                    |
|                   |                                                                                         | Chronic pulmonary disease        | 20.4                                      |                                    |
|                   |                                                                                         | Connective tissue disease        | 5.3                                       |                                    |
|                   |                                                                                         | Peptic ulcer disease             | 8.7                                       |                                    |
|                   |                                                                                         | Liver disease                    | 2.3                                       |                                    |
|                   |                                                                                         | Diabetes mellitus                | 12.2                                      |                                    |
|                   |                                                                                         | Renal disease                    | 3.8                                       |                                    |
|                   |                                                                                         | Solid cancer                     | 18.0                                      |                                    |
|                   |                                                                                         | Charlson comorbidity index score |                                           |                                    |
|                   |                                                                                         | 0                                | 37.1                                      |                                    |
|                   |                                                                                         | 1-2                              | 40.4                                      |                                    |
|                   |                                                                                         | ≥3                               | 22.6                                      |                                    |
|                   |                                                                                         | Alcoholism-related disorders     | 6.1                                       |                                    |
| Ruiz 2010 [35]    | Adults hospitalised with bacteraemic CAP due to Gram-negative bacteria<br>n=51          | Cardiac disease                  | 43.1                                      |                                    |
|                   |                                                                                         | Pulmonary disease                | 35.3                                      |                                    |
|                   |                                                                                         | Renal disease                    | 17.6                                      |                                    |
|                   |                                                                                         | Hepatic disease                  | 15.9                                      |                                    |

| Citation         | Population                                                                                                                              | Comorbid condition        | Study cohorts<br>(data are % of patients) |                               |
|------------------|-----------------------------------------------------------------------------------------------------------------------------------------|---------------------------|-------------------------------------------|-------------------------------|
|                  |                                                                                                                                         | Neurological disease      | 21.6                                      |                               |
|                  |                                                                                                                                         | Diabetes mellitus         | 21.6                                      |                               |
|                  |                                                                                                                                         | >1 comorbid condition     | 43.1                                      |                               |
| Sarkar 2008 [60] | Primary care patients ≥18 yrs with CAP<br>n=80,066                                                                                      | Alcoholism                | 2.3                                       |                               |
|                  |                                                                                                                                         | Dementia                  | 14.4                                      |                               |
|                  |                                                                                                                                         | Stroke                    | 19.2                                      |                               |
|                  |                                                                                                                                         | Diabetes mellitus         | 4.9                                       |                               |
|                  |                                                                                                                                         | Cirrhosis                 | 0.3                                       |                               |
|                  |                                                                                                                                         | Renal failure             | 0.5                                       |                               |
|                  |                                                                                                                                         | Congestive heart failure  | 10.5                                      |                               |
|                  |                                                                                                                                         | Myocardial infarction     | 9.3                                       |                               |
|                  |                                                                                                                                         | COPD or asthma            | 22.4                                      |                               |
|                  |                                                                                                                                         | Cancer                    | 7.3                                       |                               |
|                  |                                                                                                                                         | Previous CAP              | 3.2                                       |                               |
| Sopena 2007 [32] | Adults hospitalised with community-acquired Legionnaires' disease<br>[*statistically significant vs. sporadic cases; p-value not given] |                           | <b>Sporadic cases<br/>(n=138)</b>         | <b>Outbreak cases (n=113)</b> |
|                  |                                                                                                                                         | Alcohol abuse             | 26.8                                      | 16.5                          |
|                  |                                                                                                                                         | Any underlying disease    | 55.1                                      | 49.6                          |
|                  |                                                                                                                                         | Chronic lung disease      | 19.6                                      | 9.7*                          |
|                  |                                                                                                                                         | Chronic heart disease     | 12.4                                      | 11.5                          |
|                  |                                                                                                                                         | Diabetes mellitus         | 15.2                                      | 23.9                          |
|                  |                                                                                                                                         | Liver cirrhosis           | 5.9                                       | 8.8                           |
|                  |                                                                                                                                         | Neoplasm                  | 7.3                                       | 8.8                           |
|                  |                                                                                                                                         | HIV infection             | 11.6                                      | 1.8*                          |
|                  |                                                                                                                                         | Chronic renal failure     | 2.2                                       | 1.8                           |
| Sopena 2007 [33] | Adults hospitalised with CAP due to <i>Legionella pneumophila</i><br>[**p≤0.01; ***p≤0.001 vs. age ≥65 yrs]                             |                           | <b>Age &lt;65 yrs<br/>(n=104)</b>         | <b>Age ≥65 yrs<br/>(n=54)</b> |
|                  |                                                                                                                                         | Alcohol abuse             | 35.0***                                   | 9.3                           |
|                  |                                                                                                                                         | Any underlying disease    | 46.2***                                   | 75.9                          |
|                  |                                                                                                                                         | Chronic pulmonary disease | 10.6***                                   | 35.2                          |
|                  |                                                                                                                                         | Diabetes mellitus         | 7.7**                                     | 27.8                          |
|                  |                                                                                                                                         | Neuromuscular disease     | 1.0***                                    | 20.4                          |
|                  |                                                                                                                                         | Neoplasm                  | 6.7                                       | 13.0                          |
|                  |                                                                                                                                         | Heart failure             | 1.0***                                    | 14.8                          |
|                  |                                                                                                                                         | HIV infection             | 15.4***                                   | 0                             |
|                  |                                                                                                                                         | Liver cirrhosis           | 4.9                                       | 1.9                           |
|                  |                                                                                                                                         | Chronic renal failure     | 2.9                                       | 1.9                           |



| Citation               | Population                                                             | Comorbid condition               | Study cohorts<br>(data are % of patients) |                                                 |
|------------------------|------------------------------------------------------------------------|----------------------------------|-------------------------------------------|-------------------------------------------------|
|                        |                                                                        |                                  | Statin users<br>(n=1372)                  | Statin non-users<br>(n=28,528)                  |
|                        |                                                                        | Risk of aspiration               | 0**                                       | 5.6                                             |
| Thomsen 2008 [62]      | Patients ≥15 yrs hospitalised with CAP                                 |                                  |                                           |                                                 |
|                        |                                                                        | Previous myocardial infarction   | 43.6                                      | 7.9                                             |
|                        |                                                                        | Congestive heart failure         | 23.2                                      | 10.2                                            |
|                        |                                                                        | Peripheral vascular disease      | 20.9                                      | 6.9                                             |
|                        |                                                                        | Cerebrovascular disease          | 24.6                                      | 13.7                                            |
|                        |                                                                        | Dementia                         | 1.1                                       | 2.1                                             |
|                        |                                                                        | Chronic pulmonary disease        | 23.8                                      | 19.4                                            |
|                        |                                                                        | Connective tissue disease        | 4.8                                       | 4.7                                             |
|                        |                                                                        | Peptic ulcer disease             | 9.8                                       | 8.7                                             |
|                        |                                                                        | Liver disease                    | 1.0                                       | 2.0                                             |
|                        |                                                                        | Diabetes mellitus                | 29.1                                      | 9.4                                             |
|                        |                                                                        | Renal disease                    | 6.7                                       | 3.0                                             |
|                        |                                                                        | Cancer                           | 14.1                                      | 15.8                                            |
|                        |                                                                        | Alcoholism-related disorders     | 2.8                                       | 5.0                                             |
|                        |                                                                        | Charlson comorbidity index score |                                           |                                                 |
|                        |                                                                        | 0                                | 13.6                                      | 41.2                                            |
|                        |                                                                        | 1-2                              | 47.9                                      | 39.8                                            |
|                        |                                                                        | ≥3                               | 38.5                                      | 19.0                                            |
| Trifiro 2010 [15]      | Patients ≥65 yrs with a first antipsychotic drug prescription n=258    |                                  |                                           |                                                 |
|                        |                                                                        | Previous myocardial infarction   | 1.9                                       |                                                 |
|                        |                                                                        | Previous cerebrovascular event   | 17.8                                      |                                                 |
|                        |                                                                        | Heart failure                    | 21.3                                      |                                                 |
|                        |                                                                        | Swallowing problems              | 2.7                                       |                                                 |
|                        |                                                                        | COPD                             | 19.4                                      |                                                 |
|                        |                                                                        | Diabetes mellitus                | 22.5                                      |                                                 |
|                        |                                                                        | Chronic renal disease            | 2.7                                       |                                                 |
|                        |                                                                        | Chronic hepatic disease          | 3.9                                       |                                                 |
|                        |                                                                        | Cancer (excluding lung cancer)   | 14.0                                      |                                                 |
|                        |                                                                        | Parkinson's disease              | 11.6                                      |                                                 |
| van de Garde 2006 [63] | Patients >18 yrs hospitalised with a discharge diagnosis of CAP n=1108 |                                  |                                           |                                                 |
|                        |                                                                        | Heart failure                    | 11.4                                      |                                                 |
|                        |                                                                        | Respiratory disease              | 41.0                                      |                                                 |
|                        |                                                                        | Diabetes mellitus                | 12.1                                      |                                                 |
| Viasus 2011 [66]       | Adults hospitalised with CAP [***p≤0.001 vs. no renal disease]         |                                  |                                           |                                                 |
|                        |                                                                        | Any comorbid condition           | <b>No renal disease (n=3597)</b><br>63.3  | <b>Chronic renal disease (n=203)</b><br>82.3*** |

| Citation                   | Population                                                                               | Comorbid condition        | Study cohorts<br>(data are % of patients) |                                           |
|----------------------------|------------------------------------------------------------------------------------------|---------------------------|-------------------------------------------|-------------------------------------------|
|                            |                                                                                          | Chronic pulmonary disease | 27.7                                      | 28.6                                      |
|                            |                                                                                          | Chronic heart disease     | 22.5                                      | 46.8***                                   |
|                            |                                                                                          | Diabetes mellitus         | 20.0                                      | 33.0***                                   |
|                            |                                                                                          | Chronic liver failure     | 6.3                                       | 3.4                                       |
|                            |                                                                                          | Cerebrovascular disease   | 7.3                                       | 18.7***                                   |
|                            | Adults hospitalised with CAP<br>[**p≤0.01; ***p≤0.001 vs. no<br>haemodialysis]           |                           | <b>No<br/>haemodialysis<br/>(n=2091)</b>  | <b>On<br/>haemodialysis<br/>(n=44)</b>    |
|                            |                                                                                          | Any comorbid condition    | 59.3                                      | 81.8**                                    |
|                            |                                                                                          | Chronic pulmonary disease | 25.6                                      | 27.3                                      |
|                            |                                                                                          | Chronic heart disease     | 20.2                                      | 50.0***                                   |
|                            |                                                                                          | Diabetes mellitus         | 19.8                                      | 29.5                                      |
| Viasus 2011 [67]           | Patients hospitalised with CAP<br>[**p≤0.01; ***p≤0.001 vs. no<br>cirrhosis]             |                           | <b>No cirrhosis<br/>(n=3330)</b>          | <b>Cirrhosis<br/>(n=90)</b>               |
|                            |                                                                                          | Alcohol abuse             | 17.9                                      | 35.6***                                   |
|                            |                                                                                          | Any comorbid condition    | 68.5                                      | 58.9                                      |
|                            |                                                                                          | COPD                      | 27.3                                      | 22.2                                      |
|                            |                                                                                          | Chronic heart disease     | 25.4                                      | 14.4**                                    |
|                            |                                                                                          | Diabetes mellitus         | 20.1                                      | 27.8                                      |
|                            |                                                                                          | Chronic renal failure     | 6.2                                       | 4.4                                       |
| *Viegi 2006 [68]           | Primary care patients with CAP<br>[**p≤0.01; ***p≤0.001 vs.<br>patients diagnosed by GP] |                           | <b>GP diagnosed<br/>(n=548)</b>           | <b>Hospital<br/>diagnosed<br/>(n=151)</b> |
|                            |                                                                                          | Heart disease             | 17.3                                      | 45.0***                                   |
|                            |                                                                                          | Neurological disease      | 6.9                                       | 16.9***                                   |
|                            |                                                                                          | Diabetes mellitus         | 10.5                                      | 12.2                                      |
|                            |                                                                                          | Hypertension              | 30.2                                      | 43.0**                                    |
|                            |                                                                                          | Cancer                    | 9.1                                       | 7.9                                       |
|                            |                                                                                          | Chronic bronchitis        | 22.3                                      | 40.8**                                    |
|                            |                                                                                          | Asthma                    | 8.7                                       | 16.4**                                    |
|                            |                                                                                          | Emphysema                 | 18.9                                      | 34.5***                                   |
| Vila-Corcoles 2009<br>[16] | Community-dwelling individuals<br>≥65 yrs with CAP<br>n=473                              | Chronic lung disease      | 36.2                                      |                                           |
|                            |                                                                                          | Diabetes mellitus         | 25.4                                      |                                           |
|                            |                                                                                          | Chronic heart disease     | 20.9                                      |                                           |
|                            |                                                                                          | Chronic liver disease     | 4.0                                       |                                           |
|                            |                                                                                          | Cerebrovascular disease   | 5.1                                       |                                           |
|                            |                                                                                          | Chronic renal disease     | 6.8                                       |                                           |

| Citation              | Population                                                                                     | Comorbid condition                  | Study cohorts<br>(data are % of patients) |                        |                        |
|-----------------------|------------------------------------------------------------------------------------------------|-------------------------------------|-------------------------------------------|------------------------|------------------------|
|                       |                                                                                                |                                     | No EB/PA<br>(n=1833)                      | Confirmed EB<br>(n=67) | Confirmed PA<br>(n=22) |
|                       |                                                                                                | Cancer                              | 5.1                                       |                        |                        |
| von Baum 2010<br>[70] | Patients with CAP, with/without<br>EB or PA<br>[*p<0.05; **p≤0.01;<br>***p≤0.001 vs. no EB/PA] | Chronic respiratory disease         | 37                                        | 45                     | 68**                   |
|                       |                                                                                                | Renal failure                       | 6                                         | 22***                  | NR                     |
|                       |                                                                                                | Congestive heart failure            | 14                                        | 46***                  | NR                     |
|                       |                                                                                                | Cerebrovascular disease             | 5                                         | 33***                  | 32***                  |
|                       |                                                                                                | Other chronic neurological disorder | 3                                         | 15***                  | 18***                  |
|                       |                                                                                                | Diabetes mellitus                   | 13                                        | 30***                  | 27*                    |
|                       |                                                                                                | Enteral tube feeding                | 0.5                                       | 4,5***                 | 23***                  |

AIDS, acquired immune deficiency syndrome; CNS, central nervous system; COPD, chronic obstructive pulmonary disease; EB/PA, Enterobacteriaceae and/or *Pseudomonas aeruginosa*; GP, General Practitioner; HBV, hepatitis B virus; HCV, hepatitis C virus; HIV, human immunodeficiency virus; ICU, intensive care unit; LRTI, lower respiratory tract infection; NR, not reported; yr/yr, year/years.

\*This study included 10 patients aged ≤14 years.
